1 *In utero* exposure to morphine leads to sex-specific behavioral alterations that  
2 persist into adulthood in cross-fostered mice  
3  
4  
5

6 Vanessa C. Fleites<sup>1,3</sup>, Patrick S. Markwalter<sup>2</sup>, Keenan Johnson<sup>2</sup>, Mariella De Biasi<sup>1,2,3,#</sup>  
7  
8

9 <sup>1</sup>Neuroscience Graduate Group, <sup>2</sup>Neuroscience Undergraduate Program in the School of Arts &  
10 Sciences, <sup>3</sup>Department of Psychiatry, Perelman School of Medicine, University of Pennsylvania,  
11 Philadelphia

12 #Corresponding Author: Mariella De Biasi.

13 Tel: (215) 898-9579; email: [marielde@pennmedicine.upenn.edu](mailto:marielde@pennmedicine.upenn.edu)  
14  
15  
16  
17

18 Running title: *In utero* opioid exposure and its behavioral consequences  
19  
20

21 Keywords: opioids; prenatal exposure; neonatal withdrawal syndrome; ethanol use; behavioral  
22 vulnerability  
23  
24

25 **Conflict of Interest Statement:**

26 The authors declare no conflicts of interest.

27 **Data Availability Statement:**

28

29 The data that support the findings of this study are available from the corresponding author upon  
30 reasonable request.

31

32 **Funding Statement and Acknowledgements:**

33

34 This work was supported in part by NIH DA044205, DA049545, and U01 AA025931 to MDB,  
35 and NSF-GRFP grant DGE-1321851 to VCF. We thank Dr. Gordon Barr, Dr. Amelia Eisch, and  
36 Dr. Giulia Zanni for lending us the Dodotronic microphone and for their training in recording  
37 USVs and using the Raven software. We thank Melanie Schaffler for piloting the USV protocol,  
38 and Kimberly Halberstadter for partial collection of neonate and adult drinking data. We also  
39 thank Dr. Theresa Patten and Dr. Natalia A. Quijano Cardé for insightful feedback on this  
40 manuscript.

41

42 **Ethics Approval Statement:**

43 This work involved rodents in its research. The authors confirm that all animal subject research  
44 was conducted with the approval of the Institutional Animal Care and Use Committee (IACUC)  
45 at the University of Pennsylvania.

46 **Abstract**

47

48 Introduction

49

50 The opioid epidemic has seen an increase in drug use among women of reproductive age. It is  
51 well established that Opioid Use Disorder (OUD) can have many negative consequences for the  
52 health of mothers and their babies, both during pregnancy and after delivery, but our  
53 understanding of the impact of fetal opioid exposure on behavior during adolescence and  
54 adulthood is less understood. Preclinical studies have unveiled some of the long-term effects of  
55 *in utero* morphine exposure primarily using injections as the route of drug delivery. Our study  
56 utilized a model for oral, voluntary morphine self-administration to investigate neonate,  
57 adolescent, and adult offspring's behavioral phenotypes and subsequent ethanol misuse  
58 liability.

59

60 Methods

61

62 We first validated a paradigm for maternal oral intake of morphine, where female mice became  
63 morphine dependent pre-pregnancy, and continued to voluntarily consume morphine in the  
64 continuous two-bottle choice (C2BC) paradigm during pregnancy and up to offspring postnatal  
65 day 7 (PND 7). Offspring were cross-fostered to a drug-naïve dam at PND 7, to model first and  
66 second trimester *in utero* exposure in humans and to mimic the stress associated with NOWS.  
67 Bodyweight and ultrasonic vocalizations were assessed to determine alterations in the neonates.  
68 Offspring from control and morphine-exposed dams were then tested during adolescence and  
69 adulthood in a battery of behavioral tests to assess baseline behavioral phenotypes. We also  
70 computed a global behavioral score (GBS) to integrate offspring's multiple behavioral outcomes  
71 into a composite score that could be used to identify potential vulnerable and resilient  
72 populations in offspring exposed prenatally to morphine. Offspring that were tested during

73 adolescence were also evaluated during adulthood in the ethanol intermittent 2BC to assess  
74 ethanol misuse risk.

## 75 76 Results

77  
78 Using an oral maternal morphine C2BC protocol, we demonstrated that morphine dams display  
79 signs of dependence, measured by somatic signs during withdrawal, and voluntarily drink  
80 morphine throughout gestation. Neonate cross-fostered offspring display changes in spontaneous  
81 activity, body weight, and ultrasonic vocalization parameters. During adolescence, offspring  
82 display both increased baseline anxiety-like/compulsive-like behavior, while in adulthood they  
83 display increased anxiety-like behavior. No changes were found for baseline physical signs,  
84 locomotion, and depressive-like behavior during adolescence or adulthood. In addition, a greater  
85 percentage of adult male offspring exposed to maternal morphine fell into moderate and high  
86 GBS classifications, signaling a more severe behavioral phenotype, compared to male control  
87 offspring. These effects were not observed in adult female offspring exposed to morphine *in*  
88 *utero*. Additionally, male adult offspring exposed to maternal morphine reduced their 2-hour  
89 ethanol intake in the intermittent two-bottle choice (I2BC) paradigm, although no changes in 24-  
90 hour ethanol intake and preference were found. No changes were observed in female offspring of  
91 morphine-exposed dams.

## 92 93 Conclusion

94  
95 Overall, maternal morphine exposure leads to sex-specific changes in neonate, adolescent, and  
96 adult behavior, including ethanol intake.

97

98 1 – **Introduction**

99

100 Opioid Use Disorder (OUD) is a major public health concern. The 2019 National Survey  
101 on Drug Use and Health reported that 3.7% of individuals aged 12 and older, including women  
102 of childbearing age, have misused prescription and/or illicit opioids (Lipari & Park-Lee, 2020).  
103 In addition, a 2015-2016 study showed that one third of pregnant women used opioids (St.  
104 Marie, Coleman, Vignato, Arndt, & Segre, 2020). Continued opioid use in pregnant women can  
105 lead to serious maternal, fetal, and neonate complications and, in extreme cases, can lead to  
106 death (Leyenaar et al., 2021; Ostrea, Ostrea, & Simpson, 1997).

107 Some newborns prenatally exposed to opioids display a series of symptoms categorized  
108 as Neonatal Opioid Withdrawal Syndrome (NOWS). A study of maternal-infant dyads prenatally  
109 exposed to opioids reported that roughly 30-60% of newborns were diagnosed with NOWS  
110 (Leyenaar et al., 2021; Skumlien, Ibsen, Kesmodel, & Nygaard, 2020), which suggests that a  
111 proportion of newborns exposed to opioids *in utero* may develop a phenotype severe enough to  
112 require pharmacological and/or non-pharmacological interventions. Characteristic manifestations  
113 of NOWS include decreased body weight, high-pitched crying, irritability, tremors, and an  
114 inability to be soothed, among many others (Piccotti et al., 2019; Weller, Crist, Reiner, Doyle, &  
115 Berrettini, 2020). Reviews and meta-analyses of clinical data have reported infant-adolescent  
116 outcomes associated with *in utero* opioid exposure, including lower scores in neurocognitive and  
117 developmental assessments, decreased motor skills, and increased hyperactivity and aggression  
118 (Maguire et al., 2016; Minnes, Lang, & Singer, 2011; Nygaard, Slinning, Moe, & Walhovd,  
119 2017; Weller et al., 2020; Yeoh et al., 2019). However, other studies report variability in  
120 outcomes among children exposed prenatally to opioids, leading to potential differences in

121 vulnerability and resiliency in these individuals (Labella, Eiden, Tabachnick, Sellers, & Dozier,  
122 2021; Sarfi, Eikemo, Welle-Strand, Muller, & Lehmann, 2021). In addition, the long-term effects  
123 of maternal opioid use on human offspring are not fully understood, including the vulnerability  
124 to develop a psychiatric disease and the risk of drug misuse.

125 Morphine is a mu-opioid receptor (MOR) agonist and an active metabolite of heroin, so it  
126 is commonly used in studies investigating the effects of acute and chronic opioid exposure.  
127 Morphine is also the standard of care used for acute pain, and is used to sedate patients pre- and  
128 post-operatively, including mothers and newborns (Doleman et al., 2018; Lugo & Kern, 2002).  
129 Preclinical models have been used extensively to study the long-term effects of maternal  
130 morphine exposure. Several rodent studies have reported the effects of prenatal and perinatal  
131 morphine exposure on offspring outcomes, including body weight, mortality, and organ size  
132 (Ahmadalipour, Ghodrati-Jaldbakhan, Samaei, & Rashidy-Pour, 2018; Chiang, Hung, & Ho,  
133 2014; Eriksson & Rönnbäck, 1989; Glick, Strumpf, & Zimmerberg, 1977; Klausz et al., 2011;  
134 Ramsey, Niesink, & Van Ree, 1993; Shen et al., 2016; Siddiqui, Haq, & Shah, 1997; Sobor et  
135 al., 2010; Tan et al., 2015; Timár et al., 2010). However, very few of them have examined other  
136 aspects of NOWS, such as high-pitched crying. Similar to the studies in humans, preclinical  
137 models of *in utero* morphine exposure report discrepant offspring outcomes. Many factors could  
138 contribute to such variability, including differences in maternal opioid exposure paradigms,  
139 including length of exposure and dose used, and whether dams experienced varying levels of  
140 gestational stress, like being shipped while pregnant or receiving daily injections. To date, no  
141 published study has used an oral two-bottle choice (2BC) morphine self-administration protocol  
142 for the maternal dam exposure, which minimizes any confounds associated to stress.

143           The preclinical literature has also shown conflicting results on whether parental morphine  
144 causes alterations in behavior related to psychiatric disorders, including anxiety-like,  
145 compulsive-like, and depressive-like behavior. For example, in one study adult rodents exposed  
146 to morphine *in utero* displayed decreased anxiety in both the Elevated Plus Maze (EPM) and the  
147 Light-Dark Box (Tan et al., 2015). In contrast, a study where morphine was given between  
148 gestation day (GD) 1 and postnatal day (PND) 21 found no differences in offspring's anxiety-  
149 like behavior in the EPM (Klausz et al., 2011). Additionally, most studies have only examined a  
150 few offspring behaviors at a time, and to date, no study has evaluated behaviors with a  
151 comprehensive approach, to better define baseline phenotypes of adolescent and adult offspring  
152 after maternal opioid exposure.

153           Parental substance use disorder (SUD) and prenatal drug exposure is associated with a  
154 myriad of negative outcomes in offspring, including vulnerability to develop a SUD (Dodge,  
155 Jacobson, & Jacobson, 2019). Negative outcomes in the offspring depend on the timing of the  
156 parental exposure to drugs and/or other external factors (Betcher et al., 2019; Biederman,  
157 Faraone, Monuteaux, & Feighner, 2000; Dodge et al., 2019; Glantz & Chambers, 2006; Madras  
158 et al., 2019; Peleg-Oren & Teichman, 2006; Tarter et al., 2020). Pre- and perinatal opioid  
159 exposure can alter offspring's predisposition to future drug use, including risk for the same drug-  
160 class from maternal exposure (i.e. morphine) or cross-tolerance to other drugs (i.e. cocaine and  
161 methamphetamine) (Chiang et al., 2014; Gagin, Kook, Cohen, & Shavit, 1997; Glick et al., 1977;  
162 Ramsey et al., 1993; Shen et al., 2016; Timár et al., 2010; Vousooghi et al., 2018; L. Y. Wu,  
163 Chen, Tao, & Huang, 2009). To our knowledge, no preclinical study has examined potential  
164 changes in alcohol intake and preference in offspring exposed to *in utero* morphine, even though  
165 alcohol is the most commonly used drug according to the 2019 National Survey on Drug Use and

166 Health (Lipari & Park-Lee, 2020). One clinical longitudinal study reported that a significantly  
167 higher proportion of adults whose mothers used heroin during pregnancy misused alcohol during  
168 their lifetime (Nygaard, Slinning, Moe, Fjell, & Walhovd, 2020). Furthermore, there is well-  
169 documented evidence for opioid-ethanol interactions, warranting further investigation into how  
170 pre- and perinatal opioid exposure affects alcohol use risk (Arias & Kranzler, 2008; Gianoulakis,  
171 2001; Gianoulakis et al., 1989; Job et al., 2007).

172 In the present study, we utilized a translational maternal morphine paradigm, where  
173 dependent dams orally self-administered morphine in a 2BC paradigm throughout pregnancy and  
174 during the first postnatal week to model morphine exposure during early- and mid-gestation in  
175 humans (Richard & Flamant, 2018; Semple, Blomgren, Gimlin, Ferriero, & Noble-Haeusslein,  
176 2013). We examined offspring in a battery of behaviors throughout adolescence and adulthood to  
177 compile a comprehensive behavioral score. After adolescent testing, offspring were monitored  
178 for alcohol oral self-administration during adulthood, revealing sex-specific changes in ethanol  
179 intake.

180

## 181 2 – Materials and Methods

182

### 183 2.1 – Research subjects

184

185 C57BL/6J mice of both sexes (IMSR Cat# JAX:000664, RRID:IMSR\_JAX:000664)  
186 were given access to housing enrichment and *ad libitum* food and water (Labdiet, 5053, PMI,  
187 Brentwood, MO). The animals were maintained on a reverse 12-hr light/12-hr dark cycle (lights  
188 “off” at 10:00 AM) and housed in a temperature- and humidity-controlled room (65-75 °F, 40-



189 60% relative humidity). All experiments were conducted during animals' active phase (10:00  
190 AM – 8:00 PM). For all drinking experiments, an empty control cage was set up with two bottles  
191 that were weighed daily to account for fluid leakage due to cage and bottle handling. For all  
192 behavioral tests, animals were habituated to the testing room and light conditions at least 30  
193 minutes prior to the start of the test. A digital light meter was used to measure luminosity in the  
194 room for each test, reported as lux. All experiments were conducted with the approval of the  
195 Institutional Animal Care and Use Committee (IACUC) at the University of Pennsylvania.

196

## 197 2.2 – Maternal Drug Exposure

198

199 Female mice were habituated to being single-housed and to being exposed to one bottle  
200 of 0.2% saccharin (Sigma, St. Louis, MO) in filtered water for one week (Figure 1a-  
201 Habituation). After the one-week habituation, female mice were observed for 30 minutes in their  
202 home cage for baseline physical signs (room luminosity at 2 lux). Signs commonly reported for  
203 morphine withdrawal were included in the analysis: jumping, wet dog shakes, head nods/shakes,  
204 teeth chattering, diarrhea, and writhing (Muldoon et al., 2014; Pinelli & Trivulzio, 1997). Female  
205 mice were then separated into an experimental (morphine + saccharin) group, referred to as  
206 “morphine dam”, and a control (saccharin) group, referred to as “control dam”. Groups were  
207 created considering the baseline physical signs, to ensure that both groups had on average a  
208 similar total number of physical signs to start. The morphine dams were given one bottle of 0.1  
209 mg/mL free-base morphine (Morphine Sulfate, Spectrum Chemical MFG. Corp, New  
210 Brunswick, NJ) in 0.2% saccharin for four days and then the solution was escalated to 0.2  
211 mg/mL free-base morphine + saccharin for three days (Figure 1a). Bottles were weighed daily,

212 and their position was alternated to avoid side preference. Morphine intake is reported as weekly  
213 averages in mg/kg/day. To confirm dependence, female mice were tested for spontaneous signs  
214 of withdrawal 8 hours after the morphine bottle was replaced with a saccharin-only bottle, at the  
215 end of the one-week forced morphine exposure. Control female mice were maintained on one  
216 bottle of 0.2% saccharin throughout this time and observed for physical signs.

217 The female mice were then transitioned to the continuous two-bottle choice (C2BC)  
218 phase the day after somatic signs testing (Figure 1a). Mice in the morphine dam group received  
219 one bottle containing 0.1 mg/mL free-base morphine in 0.2% saccharin, and a bottle containing  
220 filtered water. Mice in the control dam group received one bottle of 0.2% saccharin solution and  
221 a bottle of filtered water. After one week of the C2BC, mice from the morphine dam group were  
222 evaluated for spontaneous physical signs of withdrawal 8 hours after removal of the morphine  
223 bottle, as described above. During week two of the C2BC paradigm, mice were evaluated again  
224 for physical signs while drug sated. Mice from the control dam group were evaluated for  
225 physical signs on the same day as the mice from the morphine dam group.

226 Because we were interested in investigating only the effects of maternal opioid use,  
227 female mice were placed daily in the cage of single-housed, drug-naïve males to mate for  
228 approximately five hours/day, and were then returned to their home cage to continue their C2BC  
229 paradigm throughout gestation. Pregnancy was confirmed by a substantial increase in body  
230 weight after one week. The day at which pups were found is referred to as postnatal day 0 (PND  
231 0). Offspring were allowed to lactate from their respective dam until PND 7 (Figure 1b). On  
232 PND 7, offspring were cross-fostered to an experienced drug-naïve dam, who had her own litter  
233 removed at the time of cross-fostering. We chose to cross-foster offspring on PND 7, because the  
234 first postnatal week is roughly equivalent to the human second trimester/early third trimester,

235 with regards to brain maturation (Barr, McPhie-Lalmansingh, Perez, & Riley, 2011; Ross,  
236 Graham, Money, & Stanwood, 2015; Semple et al., 2013). In addition, cross-fostering would  
237 allow us to evaluate early neonate outcomes after acute morphine withdrawal.

238 On PND 3, modified spontaneous physical signs from Barr *et al.* (2011) were recorded  
239 for 2 pups per litter (6-7 litters/ dam treatment), which included audible cries, rolling over, and  
240 full 360° body rotation. Each pup was removed from its cage and placed on a paper towel, under  
241 red light to minimize stress. Pups were observed for five minutes for spontaneous signs, and then  
242 immediately returned to their respective litter. Offspring were weighed on PND 3 and weighed  
243 every other day (odd days) thereafter until PND 15 (Figure 1b). Litter averages are shown for  
244 body weight data, since individual pups were not tattooed to keep track of ID. All male and  
245 female offspring cross-fostered from both control dams and morphine dams were weaned  
246 between PND 21-28 and used for neonate, adolescent, and adult testing.

247

248

### 249 2.3 – Ultrasonic Vocalizations

250

251 Evaluation of neonate offspring ultrasonic vocalizations (USVs) from both treatment  
252 groups began on PND 2 and ended on PND 12 (Figure 1b). USVs were recorded on PND 2, 4,  
253 and 6 to evaluate changes related to lactation from control dams and morphine dams. USVs were  
254 also recorded on PND 8, 10, and 12 to evaluate changes associated with cross-fostering on PND  
255 7 and potentially, morphine withdrawal, as observed in human newborns that experience NOWS.  
256 We were specifically interested in USV parameters before and after cross-fostering, so only data  
257 for PND 6 and PND 8 are reported (Figure 1b).

258 Individual pups were transferred into a small container with bedding and placed in an  
259 enclosed Styrofoam box with an ultrasonic microphone (Dodotronic Ultramic, Dodotronic,  
260 Castel Gandolfo, Italy) inserted on top. The microphone was connected to a laptop that was  
261 running Raven Pro 1.6.0 (Raven, RRID:SCR\_016190, Center for Conservation Bioacoustics,  
262 Cornell Lab of Ornithology, Ithaca, NY) to save and analyze the file as a 120-megabyte.wav file.  
263 Offspring USVs were recorded for five minutes. An average of three pups per litter was recorded  
264 on the assigned even-day PND.

265 USVs from each sound file were visualized using Raven software's spectrogram and  
266 were manually selected by an experimenter blinded to the treatment groups to avoid bias. The  
267 selections made were automatically incorporated into an aggregate Selection Table produced by  
268 Raven that gave various measurements for each call selected, including number of syllables, low  
269 frequency (Hz), high frequency (Hz), delta time (s), delta frequency (Hz), and center frequency  
270 (Hz). In Raven, delta time is described as the average difference between the start and end time  
271 of each call in the sound file. Delta frequency is defined as the average difference between the  
272 maximum and minimum frequency of each call in the sound file. Center frequency is defined as  
273 the average middle frequency of each call in the sound file.

274 We calculated the average of each measurement in the Selection Table for each pup's  
275 PND USV 5-minute file, to provide an average for a specific USV parameter for each individual  
276 pup within a litter. To compare litters across PNDs (7-9 litters/ dam treatment), the values for  
277 USV measurements for pups within a litter were averaged for a given PND based on their  
278 treatment groups, giving us a "litter average".

279

280 2.4 – Adolescent baseline behavioral tests

281

282           Offspring were habituated to handling at least five days before adolescent testing started.

283   Testing during adolescence occurred between PND 28 and PND 49.

284           To assess baseline physical signs, adolescent offspring were observed for shaking,  
285   scratching, grooming, and teeth chattering as described before (E. Perez, Quijano-Cardé, & De  
286   Biasi, 2015; Ramiro Salas, Main, Gangitano, & De Biasi, 2007). Offspring were placed in a  
287   novel cage with clean corncob bedding (room lux: 2) and observed for 20 minutes (6-9 litters  
288   examined/dam treatment). The same cages were then used for the marble burying test (MBT) to  
289   assess anxiety-like/compulsive-like behavior as previously described (Njung'e & Handley, 1991;  
290   E. E. Perez & De Biasi, 2015). Briefly, cages were filled with 5 centimeters of bedding and 20  
291   marbles evenly spaced on top. Offspring were left undisturbed for 30 minutes (room lux: 2) and  
292   the number of marbles buried (fully buried or at least 2/3 buried) was recorded.

293           At least 48 hours after the MBT, offspring were tested in the Open Field Arena (OFA)  
294   test. The OFA consisted of a white plexiglass squared platform (40 centimeters by 40  
295   centimeters) with walls (Gangitano, Salas, Teng, Perez, & De Biasi, 2009; Ramiro Salas, Pieri,  
296   Fung, Dani, & De Biasi, 2003). The OFA was divided into a center zone (20 cm by 20 cm) and a  
297   surround zone (10 cm from wall all around OFA). The average center zone luminosity was 4 lux,  
298   while the corner surround zone luminosity was 2 lux. Offspring were placed at the center of the  
299   OFA and allowed to freely explore for 30 minutes while being recorded with ANYMAZE  
300   software (Stoeling Co, Wood Dale, IL). Locomotion and anxiety-like behavior were assessed by  
301   measuring the average total distance travelled (m) and center distance ratio (distance travelled in  
302   center zone (m)/total distance travelled (m)), respectively.

303 At least 48 hours after the OFA, offspring were tested in the Elevated Plus Maze (EPM),  
304 as previously described (E. E. Perez & De Biasi, 2015; Ramiro Salas et al., 2003). The  
305 luminosity used for the open arms was 4 lux, and that for the closed arms was about 1 lux.  
306 Animals were placed in the center zone of the EPM and allowed to freely explore for 10 minutes.  
307 Average time spent in the open arms (s) and open arm entry ratio (open arm entries/ open arm  
308 entries + closed arm entries) were reported to evaluate anxiety-like behavior.

309 At least 48 hours after the EPM test, offspring were tested in the Tail Suspension Test  
310 (TST) to measure depressive-like behavior as previously described (Gangitano et al., 2009; R.  
311 Salas et al., 2008). The luminosity of the area under the tail suspension apparatus was about 4  
312 lux. Tape was used to hold the tail onto the TST apparatus, and the animal was hung upside  
313 down for six minutes. Average time spent immobile (s) was reported.

314  
315 *Global Behavioral Score Classification.* Six behavioral measures were used to calculate  
316 global baseline behavioral scores (GBS) in offspring. The measures include: (1) physical signs,  
317 calculated as the total number of physical signs, (2) anxiety-like/compulsive-like behavior,  
318 calculated as total number of marbles buried in MBT, (3) locomotion, calculated as total distance  
319 travelled in OFA, (4) anxiety-like behavior in OFA, calculated as center distance ratio, (5)  
320 anxiety-like behavior in EPM, calculated as open arm entry ratio, (6) depressive-like behavior,  
321 calculated as total immobility time in the TST. The measures used for the GBS were chosen *a*  
322 *priori* based on our hypothesis that offspring from morphine-exposed dams would display  
323 increased baseline physical signs, compulsive-like behavior, anxiety-like behavior, depressive-  
324 like behavior, and hyperlocomotion. Because our hypothesis included changes in locomotion, we  
325 used measures of anxiety-like behavior that incorporated locomotion in the measure, instead of

326 using time in a zone (i.e. if locomotion is changed then that might influence time spent in a  
327 particular zone and affect anxiety-like measures).

328         Similar to O’Neal *et al.* (2020) and Quijano Cardé *et al.* (2022), z-scores were calculated  
329 for each behavioral measure. Briefly, the group mean ( $\mu^1$ ) for each behavioral measure was  
330 subtracted from the raw individual value ( $x^1$ ) for each offspring for that behavior, and then  
331 divided by the group standard deviation,  $(x^1 - \mu^1 / \sigma_1) = z^1$ . The z-score was then multiplied by  
332 the direction (+1 or -1) for that behavioral measure, to indicate worst behavioral outcome. For  
333 example, for center distance ratio in the OFA and open arm entry ratio in the EPM, the lower the  
334 raw value, the more anxiety-like behavior the offspring displays, so the z-score for both of these  
335 behavioral measures would be multiplied by -1 to correct for the direction. Conversely, higher  
336 raw values for marbles buried indicate increased compulsive-like behavior, so the z-score is  
337 multiplied by +1 to reflect a worst behavioral outcome. Individual z-scores for each offspring  
338 were added to obtain a global behavioral score for that subject ( $\Sigma z^1 \dots z^6 = \text{GBS}$ ). Only  
339 offspring with raw data for all behavioral measures were used for this analysis.

340

341 2.5 – Adult ethanol intermittent two-bottle choice (I2BC) paradigm

342

343         Mice that were previously analyzed for adolescent baseline behaviors were examined for  
344 ethanol drinking behavior during adulthood using the ethanol I2BC, as previously described  
345 (Carnicella, Ron, & Barak, 2014; Hwa et al., 2011; Quijano Cardé & De Biasi, 2022; Quijano  
346 Cardé, Perez, Feinn, Kranzler, & De Biasi, 2021). Offspring (at least 2 months of age) were  
347 habituated to being single-housed and were exposed to two 50 mL bottles of filtered water for at  
348 least one week in the home cage. Afterwards, mice were given 24-hour access to a bottle of

349 ethanol and a bottle of water on Mondays, Wednesdays, and Fridays. On alternating days, mice  
350 were presented with two bottles containing filtered water. During week 1 or the ‘Acquisition’  
351 phase, mice were habituated to ethanol by receiving increasing concentrations of ethanol: 3%  
352 (Monday), 6% (Wednesday), and 10% (v/v) ethanol (Friday). During weeks 2-5 of the  
353 ‘Maintenance’ phase, mice were given one bottle of 20% ethanol (v/v) and one bottle of water.  
354 Mice were then transitioned to a ‘Fading’ phase of the experiment to determine if mice would  
355 drink more to maintain the same ethanol dose they received on week 6 (20% ethanol) even when  
356 the ethanol concentration was progressively decreased during the subsequent weeks. During  
357 weeks 7-10, mice were given decreasing concentrations of ethanol each week (15%, 10%, 6%,  
358 and 3% ethanol). Presentation of the ethanol bottle occurred three hours after ‘lights off’ (1:00  
359 PM), and 2- and 24- hour ethanol consumption (g/kg/day) and preference [(ethanol ml  
360 intake/total ml fluid intake)\*100%] were measured. All mice were weighed weekly. All ethanol  
361 solutions were made in filtered water (v/v) using 190-proof ethanol (Decon Laboratories Inc.,  
362 King of Prussia, PA).

363

364 2.6 – Adult baseline behavioral tests

365

366 In a separate cohort, adult (at least two months of age) group-housed offspring from  
367 control and morphine-treated dams were habituated to handling. Physical signs, MBT, OFA,  
368 EPM, and TST were examined at least 24-hours apart. To assess baseline physical signs, adult  
369 offspring were observed for jumping, shaking, scratching, grooming, and teeth chattering.  
370 Offspring were also assessed for baseline behaviors in the MBT, OFA, EPM, and TST, like  
371 described in the previous sections.



372 2.7 - Statistical analyses

373

374 Data were analyzed using Graphpad PRISM 9 and are expressed as mean +/- standard  
375 error of the mean (SEM). Litter averages are shown for neonate body weight and USV data,  
376 while individual data points are shown for dam, adolescent, and adult data. Dam and neonate  
377 outcomes were analyzed using paired t-test, t-test, or repeated measures (RM) one-way ANOVA,  
378 when appropriate. Tukey post-hoc analysis was used as recommended. Adolescent offspring data  
379 were first analyzed using a two-way ANOVA to investigate the potential effect of sex and/or  
380 dam treatment, and the interaction between the two variables. Since no effect of sex was  
381 observed, a one-way ANOVA was used for analysis of adolescent and adult offspring behavioral  
382 data. GBS classifications for adolescent and adult offspring data were analyzed using an outcome  
383 versus expected chi-square test, where the control offspring percentages for each classification  
384 ('low', 'moderate', 'high') were used as the 'expected' percentages to compare to percentages  
385 obtained from offspring from morphine-exposed dams. A RM three-way ANOVA for ethanol  
386 I2BC drinking data revealed a main effect of sex, so males and females were analyzed separately  
387 using a RM two-way ANOVA with Sidak post-hoc analysis. For the I2BC experiment, the  
388 'Acquisition', 'Maintenance', and 'Fading' phases were analyzed separately. For datasets  
389 missing values at certain experimental timepoints, a mixed effects model with a Sidak post-hoc  
390 test was performed. A *p*-value of <0.05 was considered statistically significant. ROUT (Q = 1%)  
391 was used to remove significant outliers.

392

393 3 – Results

394

395 3.1 – Validation of a maternal morphine exposure model in mice

396

397 We developed a paradigm to model opioid use in humans and ultimately investigate its  
398 effects on offspring, by using an oral morphine self-administration protocol in female pregnant  
399 mice (Figure 1a). Since human mothers who are opioid-dependent begin drug use before  
400 pregnancy, we first established a paradigm where breeding-age female mice would become  
401 dependent on morphine. To create initial opioid dependence, mice were given one bottle of  
402 escalating concentrations of morphine (0.1 mg/mL – 0.2 mg/mL), which led to increased  
403 morphine intake (paired t-test;  $t = 5.896$ ,  $df = 10$ ,  $p = 0.002$ ; Figure 2a). Under this treatment  
404 paradigm, female mice displayed increased spontaneous physical signs of withdrawal 8 hours  
405 after the removal of the morphine bottle, compared to their pre-treatment baseline (paired t-test;  $t$   
406  $= 6.835$ ,  $df = 9$ ,  $p = <0.0001$ ; Figure 2b). Mice were then transitioned to a continuous two-bottle  
407 choice (C2BC) paradigm, where they received one bottle of morphine in saccharin water and one  
408 bottle of water. Based on previous 2BC morphine protocols used in the field, saccharin was  
409 added only to the morphine bottle because morphine salt is perceived as bitter and we wanted to  
410 limit the variability of the dose of morphine consumed between dams (Belknap, 1990; Belknap,  
411 Crabbe, Riggan, & O’Toole, 1993; Ferraro et al., 2005). After one week in the morphine C2BC  
412 paradigm (week 2 of the paradigm), mice drank on average 37 mg/kg morphine solution (Figure  
413 2c). Mice also displayed increased spontaneous physical signs of withdrawal 8 hours after the  
414 removal of the morphine bottle, compared to when they were morphine-sated in the C2BC  
415 (paired t-test;  $t = 4.315$ ,  $df = 9$ ,  $p = 0.0019$ ; Figure 2d), and compared to control female mice that  
416 received drug-free sweetened fluid (t-test;  $t = 3.484$ ,  $df = 20$ ,  $p = 0.0023$ ; Figure 2e).

417 Female mice were then paired with drug naïve male mice while on the C2BC, until  
418 pregnancy was confirmed. A criteria of inclusion during the C2BC paradigm was for mice to  
419 drink above 10 mg/kg morphine during pregnancy, which has been shown to produce analgesia  
420 in rodents (Frances, Gout, Monsarrat, Cros, & Zajac, 1992; Fujita-Hamabe et al., 2012). As  
421 shown in Figure 2c, female mice continued to drink morphine in the C2BC throughout gestation  
422 and until their offspring reached PND 7, at which point pups were cross-fostered to a drug-naïve  
423 dam. During weeks 4-6 of the C2BC paradigm, dams displayed slightly lower morphine intake  
424 compared to week 2 and week 3 of the paradigm (RM mixed effects analysis;  $F(1.748, 17.19) =$   
425  $4.807, p = 0.0256$ ; Figure 2c). This phenomenon could be due to being paired with the male  
426 breeder for 5 hours during the day (week 4), and also to the increased bodyweight during  
427 pregnancy (week 5 and 6). Together, our data show that morphine-exposed dams exhibit signs of  
428 dependence upon removal of the drug and continue morphine drinking during pregnancy.

429

430 3.2 – Neonate deficits before and after cross-fostering in offspring from morphine-exposed dams

431

432 To investigate the effects of maternal morphine exposure on offspring, pups were  
433 examined during early PNDs (Figure 1b). PND 3 offspring that were exposed to morphine  
434 through lactation displayed increased spontaneous activity (t-test;  $t = 2.527, df = 23, p = 0.0188$ ;  
435 Figure 3a). Due to limited motor function during this early developmental period, the  
436 spontaneous signs monitored included audible cries, rolling over, and full 360° body rotation  
437 (Barr et al., 2011; Zhu & Barr, 2004).

438

439 To evaluate the long-term consequences associated with early-development morphine  
exposure, pups were cross-fostered to a drug-naïve dam on PND 7. This allowed for offspring to

440 experience morphine withdrawal without introducing the dam's drug-associated withdrawal  
441 behavior as a confound. Pups were weighed before and after cross-fostering, and an interaction  
442 of dam treatment x PND (RM mixed effects analysis;  $F(6, 160)=2.884, p = 0.0107$ ) and a main  
443 effect of PND (RM mixed effects analysis;  $F(1.587, 42.31)=80.41, p = <0.0001$ ) were observed  
444 (Figure 3b). Interestingly, morphine offspring had a trend for decreased body weight in early  
445 PNDs, compared to control offspring.

446 To evaluate distress that might be comparable to high-pitched crying seen in newborns  
447 with NOWS, ultrasonic vocalizations (USVs) were recorded in mice offspring before and after  
448 cross-fostering. We were specifically interested in evaluating USVs at PND 6 and PND 8, which  
449 corresponds to timepoints right before and after cross-fostering, respectively. This approach was  
450 chosen to evaluate changes while the offspring were lactating from morphine-treated dams (PND  
451 6) and when they would potentially be undergoing acute drug withdrawal (PND 8) since they  
452 could no longer lactate from their respective dam. Offspring from morphine-exposed dams  
453 displayed no changes in the number of calls compared to control (Figure 3c). There was also no  
454 effect of dam treatment on delta time (i.e. length) of calls, but there was a main effect of PND  
455 (RM two-way ANOVA;  $F(1, 14)=18.22, p = 0.0008$ ; Figure 3d). Similarly, there was no effect  
456 of dam treatment on the frequency range (delta frequency) of calls, but there was a main effect of  
457 PND (RM two-way ANOVA;  $F(1, 14)=39.70, p = <0.0001$ ; Figure 3e).

458 However, there was a significant main effect of dam treatment on the frequency  
459 parameters of offspring's USVs (Figure 3f-h). Offspring from morphine-exposed dams had calls  
460 of higher center frequency (RM two-way ANOVA;  $F(1, 14)=6.304, p = 0.0249$ ; Figure 3f)  
461 compared to control offspring, and post-hoc analysis revealed that this change was statistically  
462 significant after cross-fostering (PND 8). Offspring from morphine-exposed dams also had calls

463 of higher low-frequency points (RM two-way ANOVA;  $F(1, 14)=5.696, p = 0.0317$ ; Figure 3g).  
464 In addition, offspring exposed to *in utero* morphine had higher high-frequency points in the calls  
465 (RM two-way ANOVA;  $F(1, 14)=4.713, p = 0.0476$ ; Figure 3h), and there was a main effect of  
466 PND (RM two-way ANOVA;  $F(1, 14)=14.08, p = 0.0021$ ; Figure 3h). Post-hoc analysis  
467 revealed that offspring from morphine-exposed dams had higher high-frequency points in their  
468 calls both before cross-fostering (PND 6) and after cross-fostering (PND 8), compared to control  
469 offspring. Overall, these results show that maternal morphine exposure alters neonatal  
470 spontaneous activity, body weight, and ultrasonic vocalization acoustic parameters.

471

472 3.3 – Changes in anxiety-like/compulsive-like behavior in adolescent offspring from morphine-  
473 exposed dams

474

475 Offspring from morphine-exposed dams were evaluated for changes in behavior during  
476 adolescence to further understand the consequences of maternal opioid exposure during a critical  
477 period of development (Figure 4a). We used various behavioral tests to assess baseline changes  
478 in somatic and affective behavior, including measures to investigate locomotion, compulsive-  
479 like, anxiety-like, and depressive-like behavior. Behavioral measures were assessed for an effect  
480 of dam treatment and/or sex, but because no effect of sex was observed, males and females were  
481 combined. There was no difference in baseline physical signs between offspring from morphine-  
482 exposed dams and control offspring (Figure 4b). However, offspring from morphine-exposed  
483 dams buried more marbles than offspring from control dams in the marble burying test (MBT) (t-  
484 test;  $t=2.971, df = 69, p=0.0041$ ; Figure 4c), displaying more anxiety-like/compulsive-like  
485 behavior.

486           There was no effect of dam treatment in the Open Field Arena (OFA) for total distance  
487 travelled or center distance ratio (Figure 4d-e), nor did we detect significant differences in the  
488 open arm entry ratio in the Elevated Plus Maze (EPM; Figure 4f). Similarly, when offspring  
489 were assessed for depressive-like behavior in the Tail Suspension Test (TST), no significant  
490 difference in total immobility time was observed (Figure 4g).

491           Although there were no significant differences in various behaviors when individual tests  
492 were considered, we were interested in integrating multiple behavioral outcomes into a  
493 composite score. This would allow us to characterize offspring behavior holistically, which has  
494 been used in multiple areas of research (El-Kordi et al., 2013; Guyenet et al., 2010; Möller et al.,  
495 2018; O’Neal, Nooney, Thien, & Ferguson, 2020; Pereira de Souza Goldim et al., 2020; Shahi,  
496 Freedman, Dahl, Karandikar, & Mangalam, 2019). The use of a global severity score  
497 classification system allows us to examine the distribution of animals’ performance across  
498 multiple behavioral tests, where higher values represent higher behavioral symptom severity. As  
499 shown in Figure 4h, offspring from morphine-exposed dams have similar global behavioral  
500 scores (GBS) compared to offspring from control dams. To determine the distribution of  
501 adolescent offspring GBS, experimental scores were characterized into ‘high’ (GBS>1),  
502 ‘moderate’ (1<GBS<1), and ‘low’ (GBS<1) phenotypes. Because there was a trend (p=0.0898)  
503 for a main effect of dam treatment when the three GBS classifications were evaluated for the  
504 offspring (data not shown), we evaluated the percentage of offspring in each GBS classification.  
505 Among control offspring (n=28), 39% were classified as having a ‘low’ GBS phenotype, 29%  
506 were ‘moderate’, and 32% were ‘high’ (Figure 4i). However, offspring from morphine-exposed  
507 dams (n=29) had a higher percentage of ‘high scores’ (41%), and 35% classified as having a  
508 ‘low’ severity phenotype, while 24% were ‘moderate’ (Figure 4i). In addition, when sex was

509 investigated, 46%, 23%, and 31% of male control offspring fell under the ‘low’, ‘moderate’, and  
510 ‘high’ classification, respectively (Figure 4j). Male offspring from morphine-exposed dams were  
511 characterized at similar percentages in each GBS classification (low=50%, moderate=29%, and  
512 high=21%) (Figure 4h). Conversely, female offspring from morphine-exposed dams had a trend  
513 for a higher percentage being classified in the ‘high’ category (60%), compared to control female  
514 offspring (33%) (Figure 4k). Twenty percent of female offspring from morphine-exposed dams  
515 were categorized as ‘moderate’ and ‘low’ scorers based on their GBS, while 33%-34% of control  
516 female offspring were categorized as ‘moderate’ and ‘low’ (Figure 4k). Although the GBS  
517 classification is not significantly different between offspring, the higher percent of ‘high’ GBS  
518 phenotype in the offspring from morphine-exposed dams is intriguing in that it suggests that  
519 early life morphine exposure might lead to an increase in the number of offspring that have a  
520 more severe phenotype when considering a broad array of behaviors, as opposed to very  
521 significant deficits in any one behavioral measure.

522

### 523 3.4 – Changes in baseline behavior in adult offspring from morphine-exposed dams

524

525 We were interested in the possibility that the behavioral phenotypes we observed could  
526 persist beyond adolescence and into adulthood. Therefore, in a separate cohort of control and  
527 morphine-exposed offspring, we evaluated baseline adult behavior to determine the long-term  
528 effects of maternal morphine exposure using the same battery of behavioral tests used for  
529 adolescent mice (Figure 5a). Behavioral measures were assessed for an effect of dam treatment  
530 and/or sex, but when no effect of sex was detected, males and females were combined. Offspring  
531 from morphine dams did not significantly differ from control offspring in baseline total physical

532 signs (Figure 5b), compulsive-like behavior in the MBT (Figure 5c), locomotion or anxiety-like  
533 behavior in the OFA (Figure 5d-e), and depressive-like behavior in the TST (Figure 5h).  
534 However, when adult offspring were evaluated for anxiety-like behavior in the EPM, offspring  
535 from morphine-exposed dams displayed no difference in entry ratio (Figure 5g), but did display  
536 decreased time spent in the open arms, compared to control offspring (t-test;  $t = 2.935$ ,  $df = 35$ ,  $p$   
537  $= 0.0059$ ; Figure 5f). This suggests that offspring from morphine-exposed dams have increased  
538 anxiety-like behavior in adulthood.

539 We also used the GBS to integrate the multiple behavioral outcomes into a composite  
540 score which allowed us to characterize adult offspring behavior holistically, as described above.  
541 Although there was no difference in overall global behavioral score between offspring from  
542 morphine-exposed dams and control dams (Figure 5i), the percentage of offspring that fell into  
543 each GBS classification was of interest. For control offspring ( $n=19$ ), 48% were classified as  
544 having a ‘low’ severity phenotype, 26% were ‘moderate’, and 26% were ‘high’ (Figure 5j).  
545 However, among offspring from morphine-exposed dams ( $n=18$ ), only 28% were classified as  
546 ‘low’, 33% were ‘moderate’, and 39% were ‘high’ (Figure 5j), suggesting that a higher  
547 percentage of offspring from morphine-exposed dams might be more behaviorally vulnerable.  
548 Although the sample size was small, Figure 5k shows that the percentage of male offspring from  
549 morphine-exposed dams in each GBS classification was different than that of male control  
550 offspring (chi-square test;  $DF=2$ ;  $p=0.0052$ ). Among male control offspring ( $n=10$ ), 70% were  
551 classified as having a ‘low’ GBS severity phenotype, 10% were ‘moderate’, and 20% were  
552 ‘high’ (Figure 5k). However, among male offspring from morphine-exposed dams ( $n=9$ ), 22%  
553 were ‘low’, 33% were ‘moderate’, and 45% were ‘high’ (Figure 5k). Conversely, female  
554 offspring from morphine-exposed dams had a similar percent of offspring that fell into the three



555 GBS classifications when compared to female control offspring (Figure 5I). For example, 33%  
556 of mice were classified as having a ‘high’ GBS severity phenotype in both groups.

557         Together, our results suggest that maternal morphine exposure has long-term  
558 consequences throughout the offspring’s life span, as reflected by changes that persist in  
559 adulthood. Offspring from morphine-exposed dams display increased baseline levels of anxiety-  
560 like behavior during adulthood. In addition, a much higher percent of male offspring from  
561 morphine-exposed dams fall into the high and moderate GBS severity classification. This  
562 suggests that not only are specific phenotypes altered by *in utero* opioid exposure, but that,  
563 overall, male offspring are at risk of developing more severe behavioral phenotypes during  
564 adulthood, a phenomenon that could be revealed or exacerbated by stress or drug use.

565

566 3.5 – Male offspring from morphine-exposed dams display decreased two-hour ethanol intake

567

568         Given the well-documented interactions between alcohol and the opioid system (Arias &  
569 Kranzler, 2008; Berrettini, 2013; Gianoulakis, 2001; Gianoulakis et al., 1989; Job et al., 2007;  
570 Oslin, Berrettini, & O’Brien, 2006), we next wanted to assess alcohol use risk in offspring  
571 maternally exposed to morphine. The offspring tested in the battery of behavioral tests during  
572 adolescence were allowed to mature into adulthood and were then evaluated in an ethanol  
573 intermittent two-bottle choice (I2BC) paradigm (Figure 6a), which has been used to assess  
574 voluntary ethanol intake (Carnicella et al., 2014; Hwa et al., 2011; Quijano Cardé & De Biasi,  
575 2022; Quijano Cardé et al., 2021). A three-way ANOVA revealed a main effect of sex where  
576 female mice (regardless of treatment) drank significantly more ethanol than male mice, so data  
577 and analyses are presented separately for each sex. Alcohol-related behaviors were evaluated at

578 three different phases of the I2BC – Acquisition, Maintenance, and Fading - for both male and  
579 female offspring.

580

581 *Acquisition phase of I2BC*

582

583 Ethanol drinking patterns were first evaluated for the ‘Acquisition’ phase of the I2BC,  
584 where mice were given increasing concentrations of ethanol during the first week of exposure.  
585 Figure 6b shows a main effect of concentration for 2-hour intake during the ‘Acquisition’ phase  
586 for male offspring (RM mixed effects analysis;  $F(1.417, 34.02) = 133.9, p < 0.0001$ ) and a main  
587 effect of dam treatment (RM mixed effects analysis;  $F(1, 26) = 6.176, p = 0.0197$ ). Specifically,  
588 post-hoc analysis revealed that male offspring from morphine-exposed dams drink less ethanol  
589 (g/kg) at the 6% concentration during the first two hours of the session, compared to male  
590 control offspring. When ethanol intake (g/kg) was evaluated during the 24-hour sessions of the  
591 ‘Acquisition’ phase (Supplemental figure 1a), although not significant, a trend ( $p = 0.0791$ ) for an  
592 effect of dam treatment was present for male offspring. There was a main effect of concentration  
593 for the 24-hour ethanol intake (RM two-way ANOVA;  $F(1.648, 42.86) = 138.9, p < 0.0001$ ;  
594 Supplemental figure 1a). With regards to male offspring’s 2-hour ethanol preference (%) during  
595 the ‘Acquisition’ phase (Figure 6c), there was a main effect of concentration (RM mixed effects  
596 analysis;  $F(1.801, 43.22) = 8.540, p < 0.0001$ ), but no main effect of dam treatment. In addition,  
597 there was no main effect or interaction of concentration and/or dam treatment during male  
598 offspring’s 24-hour ethanol preference during the ‘Acquisition’ phase (Supplemental figure 1b).

599 In female offspring, the 2-hour session for the ‘Acquisition’ phase of the I2BC revealed a  
600 significant main effect of concentration for ethanol intake (g/kg) (RM mixed effects analysis;

601  $F(1.770, 35.39) = 134.3, p < 0.0001$ ; Figure 6d) and preference (%) (RM mixed effects analysis;  
602  $F(1.621, 32.42) = 7.813, p = 0.0030$ ; Figure 6e), but no effect of dam treatment. Similarly, for  
603 female offspring's 24-hour ethanol intake (g/kg) (Supplemental figure 1c) there was a main  
604 effect of concentration (RM two-way ANOVA;  $F(1.818, 40.00) = 175.6, p < 0.0001$ ), but no  
605 effect of dam treatment. Although not significant, there was a trend ( $p=0.0699$ ) for a main effect  
606 of concentration, but no effect of dam treatment on female offspring's 24-hour ethanol  
607 preference for the 'Acquisition' phase (Supplemental figure 1d).

608 Together, this reveals that male -but not female- offspring from morphine-exposed dams  
609 drink lower amounts of ethanol during the 'Acquisition' phase of the I2BC, but have no changes  
610 in ethanol preference during this part of the experimental paradigm.

611

#### 612 *Maintenance phase of I2BC*

613

614 Ethanol drinking patterns were next evaluated during the 'Maintenance' phase of the  
615 I2BC, where mice were exposed every other day for four weeks (weeks 2-5) to two bottles, one  
616 containing 20% ethanol and the other containing water. In male offspring during the  
617 'Maintenance' phase, there was no effect of week, and although not significant, a trend  
618 ( $p=0.0793$ ) was present for dam treatment for two-hour ethanol intake (g/kg) (Figure 6b). In  
619 addition, there was no effect of week or dam treatment for males' 24-hour ethanol intake (g/kg)  
620 during the 'Maintenance' phase (Supplemental figure 1a). With regards to male offspring's  
621 ethanol preference (%) during the 'Maintenance' phase, there was a main effect of week for the  
622 two-hour session (RM two-way ANOVA;  $F(2.163, 56.23) = 3.369, p = 0.0380$ ; Figure 6c) and

623 24-hour session (RM two-way ANOVA;  $F(1.900, 49.40) = 6.162, p = 0.0047$ ; Supplemental  
624 figure 1b), but no main effect of dam treatment.

625 Female offspring did not show a significant difference of week or dam treatment for 2-  
626 hour (Figure 6d) and 24-hour (Supplemental figure 1c) ethanol intake (g/kg) during the  
627 ‘Maintenance’ phase of the I2BC. However, there was a main effect of week for both 2-hour  
628 (RM mixed effects analysis;  $F(2.746, 59.50) = 4.141, p = 0.0118$ ; Figure 6e) and 24-hour ethanol  
629 preference (RM two-way ANOVA;  $F(2.848, 62.66) = 6.698, p = 0.0007$ ; Supplemental figure  
630 1d), but no effect of dam treatment.

631 Together, our data show that ethanol intake and preference during the 20% ethanol  
632 ‘Maintenance’ phase of the I2BC in both male and female offspring from morphine-exposed  
633 dams are similar to control, implying that there is no effect of dam treatment.

634

#### 635 *Fading phase of I2BC*

636

637 Lastly, ethanol drinking patterns were evaluated for the ‘Fading’ phase of the I2BC,  
638 where mice were given decreasing concentrations of ethanol (20%, 15%, 10%, 6%, 3%) for the  
639 remaining five weeks of the paradigm. As shown in Figure 6b, analysis of the 2-hour ethanol  
640 intake during the ‘Fading’ phase for male offspring revealed a main effect of concentration (RM  
641 two-way ANOVA;  $F(1.960, 50.95) = 79.10, p < 0.0001$ ), a main effect of dam treatment (RM  
642 two-way ANOVA;  $F(1, 26) = 4.267, p = 0.0490$ ), and a concentration x dam treatment interaction  
643 (RM two-way ANOVA;  $F(4, 104) = 3.079, p = 0.0193$ ). Specifically, our data suggest that male  
644 offspring from morphine-exposed dams consume less ethanol at various concentrations during  
645 the 2-hour ‘Fading phase’ of the paradigm. When the 24-hour ethanol intake (g/kg) during the

646 ‘Fading’ phase was evaluated, there was a main effect of concentration (RM two-way ANOVA;  
647  $F(2.562, 66.62) = 142.4, p < 0.0001$ ; Supplemental figure 1a), but not dam treatment. With  
648 regards to male offspring’s 2-hour ethanol preference (%) during the ‘Fading’ phase, there was a  
649 main effect of concentration (RM two-way ANOVA;  $F(2.335, 60.71) = 11.19, p < 0.0001$ ; Figure  
650 6c), but no main effect of dam treatment and a trend for an interaction ( $p=0.0927$ ). Similarly,  
651 during male offspring’s 24-hour ethanol preference in the ‘Fading’ phase, there was a main  
652 effect of concentration (RM two-way ANOVA;  $F(2.155, 56.04) = 84.08, p < 0.0001$ ;  
653 Supplemental figure 1b), but no main effect of dam treatment.

654 No differences were detected when comparing control and morphine-exposed female  
655 offspring. We found a significant main effect of concentration for ethanol intake (g/kg) (RM  
656 two-way ANOVA;  $F(2.219, 48.81) = 72.56, p < 0.0001$ ; Figure 6d) and preference (%) (RM two-  
657 way ANOVA;  $F(2.664, 58.62) = 24.01, p < 0.0001$ ; Figure 6e) at the 2-hour timepoint during the  
658 ‘Fading’ phase of the I2BC, but no effect of dam treatment. Similarly, at 24-hour there was a  
659 significant main effect of concentration for ethanol intake (g/kg) (RM two-way ANOVA;  
660  $F(2.049, 45.07) = 108.6, p < 0.0001$ ; Supplemental figure 1c) and preference (%) (RM two-way  
661 ANOVA;  $F(3.099, 68.19) = 144.0, p < 0.0001$ ; Supplemental figure 1d), but no effect of dam  
662 treatment.

663 Overall, our results indicate that male -but not female- offspring from morphine-exposed  
664 dams drink lower amounts of ethanol during the initial 2-hour phase of the ‘Fading’ experiment  
665 although there are no changes in ethanol preference.

666  
667 It should be noted that there was a main effect of dam treatment (RM two-way ANOVA;  
668  $F(1,26) = 7.678, p = 0.0102$ ; Supplemental Figure 2b) for 24-hour total fluid intake for male

669 offspring, and a main effect of week (RM two-way ANOVA;  $F(2.576,66.98) = 18.00, p =$   
670  $<0.0001$ ), where male offspring from morphine-exposed dams had lower total fluid intake  
671 compared to male control offspring. This main effect of dam treatment for total fluid intake was  
672 not observed at the two-hour timepoint (Supplemental Figure 2a, 2c).

673

674

#### 675 4 - Discussion

676

677 Our maternal morphine C2BC paradigm demonstrated that morphine dams display signs  
678 of dependence and voluntarily drink morphine throughout gestation. Maternal morphine  
679 exposure with this paradigm increases neonate spontaneous activity, decreases body weight  
680 before cross-fostering, and alters various USV frequency parameters. The set of experiments  
681 presented in this study also demonstrates subtle sex-specific alterations in adolescent and adult  
682 offspring exposed to pre- and perinatal morphine. Overall, the data presented supports the  
683 hypothesis that maternal opioid exposure alters offspring behavior throughout development.

684 Our study is one of few to investigate offspring outcomes using a maternal oral self-  
685 administration model that starts before gestation, continues throughout gestation, and extends  
686 one week postnatally. Most preclinical studies investigating the effects of *in utero* morphine  
687 exposure on offspring behavior have used daily injections or forced oral solution, making it  
688 difficult to discern whether the effect seen in offspring is due to an interaction of maternal stress  
689 with opioid exposure, or solely due to opioid exposure (Chiou et al., 2003; Glick et al., 1977;  
690 Klausz et al., 2011; Nasiraei-Moghadam et al., 2013; Siddiqui et al., 1997; Sobor et al., 2010;  
691 Timár et al., 2010; P. L. Wu et al., 2018; Yang et al., 2003). In addition, the duration of maternal

692 opioid administration varies across studies. For example, studies differ among each other for  
693 using a partial gestation, full gestation, or gestation and lactation maternal opioid paradigm  
694 (Chiou et al., 2003; De Vries et al., 1991; Eriksson & Rönnbäck, 1989; Gagin et al., 1997; Glick  
695 et al., 1977; Jóhannesson & Becker, 1972; Klausz et al., 2011; Laborie et al., 2005; Ramsey et  
696 al., 1993; Rimanóczy, Šlamberová, Riley, & Vathy, 2003; Schindler et al., 2004; Shen et al.,  
697 2016; Tan et al., 2015; Timár et al., 2010; P. L. Wu et al., 2018; Yang et al., 2003). Each of these  
698 exposure paradigms models specific critical developmental periods for the fetus and can confer  
699 paradigm-specific behavioral alterations.

700 An extended maternal morphine treatment that continues throughout the lactation period  
701 might be necessary to recapitulate the clinical outcomes of prenatal morphine and NOWS,  
702 considering that rodent gestation/early offspring postnatal period has been compared to late  
703 human gestation and newborn birth, when considering various morphological and functional  
704 milestones relating to eye, cardiac, immune, and brain development (Clancy, Darlington, &  
705 Finlay, 2001; Craig et al., 2003; Holsapple, West, & Landreth, 2003; Krishnan et al., 2014;  
706 Kroon, van Hugte, van Linge, Mansvelder, & Meredith, 2019; Lazic, 2012; Rice & Barone,  
707 2000; Richard & Flamant, 2018; Van Cruchten et al., 2017). Due to the short gestation period  
708 compared to humans, many developmental processes (e.g. myelination and immune function)  
709 continue postnatally in rodents (Craig et al., 2003; Holsapple et al., 2003). Caution is therefore  
710 warranted when making direct developmental comparisons between species since this is  
711 dependent on the processes being investigated and the developmental window studied. Overall,  
712 early rodent postnatal days might be an important consideration when developing maternal drug  
713 exposure paradigms. For this reason, we cross-fostered the offspring at PND 7 to a drug-naïve  
714 dam rather than removing the morphine bottle from the dam, thereby preventing maternal

715 withdrawal behavior from becoming a confound in the study. We also wanted the rodent pups to  
716 undergo morphine withdrawal and potentially experience characteristics of NOWS that can be  
717 investigated before weaning and might produce long-term behavioral consequences. Most  
718 clinical and preclinical studies have shown that offspring from opioid-dependent mothers display  
719 either reduced body weight or no change in body weight (Corr, Schaefer, & Paul, 2018; Dutriez-  
720 Casteloot et al., 1999; Gagin et al., 1997; Jones et al., 2010; Kaltenbach et al., 2018; Klausz et  
721 al., 2011; Laborie et al., 2005; Ramsey et al., 1993; Shen et al., 2016; Siddiqui et al., 1997; Siu &  
722 Robinson, 2014; Timár et al., 2010). However, some preclinical studies like Chiang *et al.* (2010)  
723 and Timar *et al.* (2010) have reported increased body weight in PND 7, PND 14, and PND 21  
724 offspring after maternal morphine exposure. Although we anticipated decreased body weight in  
725 offspring from morphine-exposed dams even after cross-fostering, our data suggest that cross-  
726 fostering increases overall pup mortality (data not shown) and might stunt body weight gain in  
727 control offspring. This phenomenon has also been reported in other models of cross-fostering  
728 (Santangeli et al., 2016). In addition, cross-fostering has been shown to affect both maternal and  
729 offspring behavior (Dulor Finkler, Espinoza Pardo, & Bolten Lucion, 2020; Gauthier, Deangeli,  
730 & Bucci, 2015; R. Šlamberová, Hrubá, Bernášková, Matějovská, & Rokyta, 2010; I. Vathy,  
731 Šlamberová, & Liu, 2007), likely due to the stress associated with the new environment and  
732 alterations in the mother-infant relationship. This posits the question of whether the drug-naïve  
733 dam euthanized the most “vulnerable” offspring, and whether the relatively subtle behavioral  
734 effects we observed between control and morphine-exposed offspring might be due to the fact  
735 that we tested the “resilient” offspring that survived after cross-fostering.

736         Preclinical studies aim to model maternal opioid exposure that results in offspring  
737 outcomes comparable to those of human newborns experiencing NOWS. For example, studies



738 have examined developmental milestones in rodents, as well as pup mortality and bodyweight  
739 and compared them to newborn outcomes in clinical studies (Chiang, Hung, Lee, Yan, & Ho,  
740 2010; Dutriez-Casteloot et al., 1999; Eriksson & Rönnbäck, 1989; Gagin et al., 1997;  
741 Jóhannesson & Becker, 1972; Laborie et al., 2005; Ramsey et al., 1993; Siddiqui et al., 1997;  
742 Sobor et al., 2010; Timár et al., 2010). To our knowledge, this is the first study to investigate  
743 how maternal morphine exposure alters ultrasonic vocalizations in pups, as a correlate to high-  
744 pitched crying in human newborns and as a characteristic of NOWS. Similar to our results, one  
745 study found that offspring from oxycodone-exposed dams have higher frequency USVs than  
746 control offspring (Zanni et al., 2021). Another study also found that neonate offspring injected  
747 with morphine from PND 1 – 14 had increased USV frequency parameters (Borrelli et al., 2021).  
748 Various studies and reviews have focused on understanding vocalizations and changes in their  
749 acoustic parameters, including how upward shifts in frequency modulation is usually associated  
750 with an increase in infant distress (Brudzynski, 2015; Castellucci, Calbick, & McCormick, 2019;  
751 Esposito, Nakazawa, Venuti, & Bornstein, 2013; Hahn & Lavooy, 2005; Kromkhun et al., 2013;  
752 Lingle, Wyman, Kotrba, Teichroeb, & Romanow, 2012; Parga et al., 2020; Wasz-Höckert,  
753 Michelsson, & Lind, 1985). Although our work did not further probe the specific brain-regions  
754 and mechanisms that lead to alterations in USV frequency parameters in offspring from  
755 morphine-exposed dams, other studies have shown that the periaqueductal grey (PAG), a brain  
756 region with dense expression of opioid receptors, and the opioid receptor system in general, are  
757 important for USV syllable production (D'Amato, 2021; Goodwin & Barr, 2005; Tschida et al.,  
758 2019). For example, PAG lesions decrease USVs in pups (Wiedenmayer, Goodwin, & Barr,  
759 2000) and mu-opioid receptor knockout (*Orpm<sup>-/-</sup>*) pups emit less USV calls compared to their  
760 littermates in response to maternal isolation (Moles, Kieffer, & D'Amato, 2004). Offspring

761 exposed to opioids *in utero* display changes in the opioid receptor system (Chiou et al., 2003;  
762 Ilona Vathy, Šlamberová, Rimanóczy, Riley, & Bar, 2003), which further supports our finding  
763 that offspring from morphine-exposed dams have profound changes in USV-related parameters.  
764 The functional role of brain-region specific changes in opioid receptor and endogenous opioid  
765 levels in areas such as the PAG merits further investigation.

766 In addition to changes in neonatal outcomes, offspring from morphine-exposed dams also  
767 display changes in baseline behavior during adolescence and adulthood. Although we found no  
768 significant differences in locomotion or depressive-like behavior, adolescent offspring from  
769 morphine-exposed dams displayed increased anxiety-like/compulsive-like behavior in the MBT.  
770 During adulthood, offspring from morphine dams displayed increased anxiety-like behavior in  
771 the EPM. Contrary to what we found, a few preclinical studies investigating the effects of  
772 prenatal morphine exposure found either decreased anxiety-like behavior or no changes in  
773 anxiety-related behaviors, which highlights how duration and dose of maternal morphine  
774 exposure can have seemingly opposite effects in offspring (Klausz et al., 2011; Tan et al., 2015).  
775 Interestingly, similar to our results of increased anxiety-like/compulsive-like behavior in  
776 offspring from morphine-exposed dams, male offspring from morphine-exposed parents  
777 displayed decreased percent open arm time in the EPM (Sabzevari et al., 2019; Vousooghi et al.,  
778 2018), increased grooming, and increased marbles buried (Rohbani et al., 2019), suggesting  
779 increased anxiety-like/compulsive-like behavior. Together with our results, these data suggest  
780 increased behavioral vulnerability in male offspring from morphine-exposed dams, while there  
781 are no apparent changes in female offspring behavior. In clinical studies, few have investigated  
782 how prenatal exposure to opioids affects males and females differently.

783           The variability observed in preclinical findings is likely attributable, among other factors,  
784 to the inherent vulnerability and/or resiliency of sub-populations of newborns, and to the many  
785 differences in maternal drug exposure paradigms. These differences include dose of drug,  
786 duration and timing of exposure, and route of drug administration. This not only leads to  
787 pharmacokinetic and pharmacodynamic differences but also differentially impacts the stress  
788 experienced by the dam during treatment, a phenomenon that may lead to changes in offspring  
789 behavior. Similar discrepancies are also a consideration for retrospective clinical studies and can  
790 make cross-study comparisons difficult.

791           Prenatal or early life stress can increase susceptibility to various behavioral  
792 manifestations in male rodents later in adulthood (Columba-Cabezas, Iaffaldano, Chiarotti,  
793 Alleva, & Cirulli, 2009; Lebow et al., 2019; Sarkar, 2015). In this context, prenatal opioid  
794 exposure and the experience of NOWS might also be viewed as a stressor capable of modifying  
795 behavior later in life. One potential explanation for observing changes in adulthood - and not  
796 adolescence - in male offspring could be that a more severe behavioral phenotype is unmasked  
797 among male offspring from morphine-exposed dams once all hormonal, chemical, and circuitry-  
798 related changes have matured in adulthood (Sinclair, Purves-Tyson, Allen, & Weickert, 2014).  
799 Interestingly, a higher percentage (45% vs. 20% in control offspring) of male offspring from  
800 morphine-exposed dams were classified as having higher and more severe global behavioral  
801 scores during adulthood. Merhar *et al.* (2019) reported that 40% of opioid-exposed newborns  
802 exhibit significant brain alterations, suggesting that the disruption of key processes during the  
803 development of the nervous system might increase vulnerability to behavioral deficits later in  
804 life. Similar to the percentage value in the clinical data, our study finds that 39% of adolescent  
805 offspring and 41% of adult offspring from morphine-exposed dams fall under the 'High' GBS

806 classification, suggesting a more severe behavioral phenotype. Analyzing offspring behavior  
807 using a composite score might therefore help to identify vulnerable sub-populations of  
808 individuals that need additional non-pharmacological and/or pharmacological interventions At a  
809 minimum, such stratification might improve testing drug efficacy, as proposed by the Food and  
810 Drug Administration (FDA, 2019).

811       Offspring exposed prenatally to morphine have altered sensitivity to drugs, including  
812 morphine, cocaine, and methamphetamine, and display changes in drug-reward related behavior  
813 (Akbarabadi et al., 2018; Chiang et al., 2014; Gagin et al., 1997; Glick et al., 1977; He, Bao, Li,  
814 & Sui, 2010; Jiang, He, Wang, & Sui, 2011; Ramsey et al., 1993; Sadat-Shirazi et al., 2019; Shen  
815 et al., 2016; Timár et al., 2010; Wang, Yao, Li, Nie, & He, 2017; L. Y. Wu et al., 2009). Nygaard  
816 *et al.* (2020) showed that although there were no significant differences in alcohol consumption  
817 in a one-year span in adults whose mothers misused heroin, a significantly higher proportion of  
818 those individuals reported misusing alcohol during their lives. To date, no preclinical study  
819 seems to have established a relationship between *in utero* morphine exposure and offspring  
820 alcohol use. Although we hypothesized that offspring exposed to pre- and perinatal morphine  
821 would have higher ethanol intake and preference, we surprisingly found that male offspring from  
822 morphine-exposed dams had lower 2-hour ethanol intake, compared to male control offspring,  
823 despite no changes in alcohol preference. ‘Front-loading’ behavior, wherein the largest amount  
824 of ethanol consumed is observed toward the onset of EtOH access, is thought to reflect increased  
825 motivation to experience the rewarding effects of ethanol (Darevsky et al., 2019; Linsenhardt &  
826 Boehm, 2014; Rhodes et al., 2007; Salling et al., 2018; Wilcox et al., 2014), and, therefore, it is  
827 tempting to speculate that early exposure to morphine changes the subjective reward to ethanol.  
828 Among other mechanisms, alcohol leads to hypothalamic activation and increased levels of

829 glucocorticoids which modify reward-related behaviors by stimulating mesencephalic  
830 dopaminergic transmission and increasing norepinephrine (NE) levels in the prefrontal cortex  
831 (PFC) (Piazza & Le Moal, 1997). Reduced drinking in morphine-exposed male offspring at the  
832 2-hour timepoint might be due to hypoactivity of the stress response and/or hypothalamic-  
833 pituitary-adrenal (HPA) axis, which has been shown to be dysregulated in rodent offspring  
834 exposed to *in utero* morphine (Klausz et al., 2011; Laborie et al., 2005; Rimanóczy et al., 2003;  
835 Romana Šlamberová, Rimanóczy, Riley, & Vathya, 2004). Further studies are needed to  
836 understand the influence of maternal morphine exposure on HPA axis function, and  
837 consequently the effects on ethanol use. It is still unclear how alterations in fetal development by  
838 gestational opioids compound with other factors, such as stress or subsequent drug exposure,  
839 manifest in adulthood.

840

## 841 5 - Conclusion

842 The data presented supports the hypothesis that prenatal-perinatal morphine exposure  
843 alters offspring behavior. Although not modeled in our study, important factors that influence  
844 and can exacerbate human offspring outcomes include: mother's poly-drug use, socioeconomic  
845 stress experienced by pregnant mothers, and stressors experienced by the offspring. Questions  
846 left to be answered include whether or not stress during adolescence and/or adulthood can “push”  
847 offspring exposed prenatally to opioids from the ‘moderate’ behavioral severity phenotype to the  
848 ‘high’ category, and whether stress can alter adolescent and adult drug reward sensitivity,  
849 including commonly used drugs like ethanol and tobacco products.

850

851

852 **6- References**

- 853 Ahmadalipour, A., Ghodrati-Jaldbakhan, S., Samaei, S. A., & Rashidy-Pour, A. (2018).  
854 Deleterious effects of prenatal exposure to morphine on the spatial learning and  
855 hippocampal BDNF and long-term potentiation in juvenile rats: Beneficial influences of  
856 postnatal treadmill exercise and enriched environment. *Neurobiology of Learning and*  
857 *Memory*, *147*, 54–64. <https://doi.org/10.1016/j.nlm.2017.11.013>
- 858 Akbarabadi, A., Niknamfar, S., Vousooghi, N., Sadat-Shirazi, M. S., Toolee, H., & Zarrindast,  
859 M. R. (2018). Effect of rat parental morphine exposure on passive avoidance memory and  
860 morphine conditioned place preference in male offspring. *Physiology and Behavior*, *184*,  
861 143–149. <https://doi.org/10.1016/j.physbeh.2017.11.024>
- 862 Arias, A. J., & Kranzler, H. R. (2008). Treatment of co-occurring alcohol and other drug use  
863 disorders. *Alcohol Research and Health*, Vol. 31, pp. 155–167. National Institute on  
864 Alcohol Abuse and Alcoholism. Retrieved from <http://www.niaaa.nih.gov/>
- 865 Barr, G. A., McPhie-Lalmansingh, A., Perez, J., & Riley, M. (2011). Changing mechanisms of  
866 opiate tolerance and withdrawal during early development: Animal models of the human  
867 experience. *ILAR Journal*, *52*(3), 329–341. <https://doi.org/10.1093/ilar.52.3.329>
- 868 Belknap, J. K. (1990). Physical dependence induced by the voluntary consumption of morphine  
869 in inbred mice. *Pharmacology, Biochemistry and Behavior*, *35*(2), 311–315.  
870 [https://doi.org/10.1016/0091-3057\(90\)90161-A](https://doi.org/10.1016/0091-3057(90)90161-A)
- 871 Belknap, J. K., Crabbe, J. C., Riggan, J., & O’Toole, L. A. (1993). Voluntary consumption of  
872 morphine in 15 inbred mouse strains. *Psychopharmacology*, *112*(2–3), 352–358.  
873 <https://doi.org/10.1007/BF02244932>
- 874 Berrettini, W. (2013). Opioid pharmacogenetics of alcohol addiction. *Cold Spring Harbor*

- 875 *Perspectives in Medicine*, 3(7), a012203. <https://doi.org/10.1101/cshperspect.a012203>
- 876 Betcher, H. K., Vande Voort, J. L., Croarkin, P. E., Gandhi, K. D., Shekunov, J., Larrabee, B. R.,  
877 ... Romanowicz, M. (2019). Outcomes of Children of Parents in Medication-Assisted  
878 Treatment Compared to Healthy Controls. *Primary Care Companion to the Journal of*  
879 *Clinical Psychiatry*, 21(4), 0–0. <https://doi.org/10.4088/PCC.19m02474>
- 880 Biederman, J., Faraone, S. V., Monuteaux, M. C., & Feighner, J. A. (2000). Patterns of alcohol  
881 and drug use in adolescents can be predicted by parental substance use disorders.  
882 *Pediatrics*, 106(4 I), 792–797. <https://doi.org/10.1542/peds.106.4.792>
- 883 Borrelli, K. N., Yao, E. J., Yen, W. W., Phadke, R. A., Ruan, Q. T., Chen, M. M., ... Bryant, C.  
884 D. (2021). Sex differences in behavioral and brainstem transcriptomic neuroadaptations  
885 following neonatal opioid exposure in outbred mice. *Eneuro*, 8(5), ENEURO.0143-21.2021.  
886 <https://doi.org/10.1523/eneuro.0143-21.2021>
- 887 Brudzynski, S. (2015). Pharmacology of Ultrasonic Vocalizations in adult Rats: Significance,  
888 Call Classification and Neural Substrate. *Current Neuropharmacology*, 13(2), 180–192.  
889 <https://doi.org/10.2174/1570159x13999150210141444>
- 890 Carnicella, S., Ron, D., & Barak, S. (2014). Intermittent ethanol access schedule in rats as a  
891 preclinical model of alcohol abuse. *Alcohol*, Vol. 48, pp. 243–252. Elsevier Inc.  
892 <https://doi.org/10.1016/j.alcohol.2014.01.006>
- 893 Castellucci, G. A., Calbick, D., & McCormick, D. (2019). The temporal organization of mouse  
894 ultrasonic vocalizations. *PLoS ONE*, 13(10). <https://doi.org/10.1371/journal.pone.0199929>
- 895 Chiang, Y. C., Hung, T. W., & Ho, I. K. (2014). Development of sensitization to  
896 methamphetamine in offspring prenatally exposed to morphine, methadone and  
897 buprenorphine. *Addiction Biology*, 19(4), 676–686. <https://doi.org/10.1111/adb.12055>

- 898 Chiang, Y. C., Hung, T. W., Lee, C. W. S., Yan, J. Y., & Ho, I. K. (2010). Enhancement of  
899 tolerance development to morphine in rats prenatally exposed to morphine, methadone, and  
900 buprenorphine. *Journal of Biomedical Science*, *17*, 46. [https://doi.org/10.1186/1423-0127-](https://doi.org/10.1186/1423-0127-17-46)  
901 17-46
- 902 Chiou, L. C., Yeh, G. C., Fan, S. H., How, C. H., Chuang, K. C., & Tao, P. L. (2003). Prenatal  
903 morphine exposure decreases analgesia but not K<sup>+</sup> channel activation. *NeuroReport*, *14*(2),  
904 239–242. <https://doi.org/10.1097/00001756-200302100-00016>
- 905 Clancy, B., Darlington, R. B., & Finlay, B. L. (2001). Translating developmental time across  
906 mammalian species. *Neuroscience*, *105*(1), 7–17. [https://doi.org/10.1016/S0306-](https://doi.org/10.1016/S0306-4522(01)00171-3)  
907 4522(01)00171-3
- 908 Columba-Cabezas, S., Iaffaldano, G., Chiarotti, F., Alleva, E., & Cirulli, F. (2009). Early  
909 handling increases susceptibility to experimental autoimmune encephalomyelitis (EAE) in  
910 C57BL/6 male mice. *Journal of Neuroimmunology*, *212*(1–2), 10–16.  
911 <https://doi.org/10.1016/j.jneuroim.2009.05.007>
- 912 Corr, T. E., Schaefer, E. W., & Paul, I. M. (2018). Growth during the first year in infants affected  
913 by neonatal abstinence syndrome. *BMC Pediatrics*, *18*(1). [https://doi.org/10.1186/s12887-](https://doi.org/10.1186/s12887-018-1327-0)  
914 018-1327-0
- 915 Craig, A., Luo, N. L., Beardsley, D. J., Wingate-Pearse, N., Walker, D. W., Hohimer, A. R., &  
916 Back, S. A. (2003). Quantitative analysis of perinatal rodent oligodendrocyte lineage  
917 progression and its correlation with human. *Experimental Neurology*, *181*(2), 231–240.  
918 [https://doi.org/10.1016/S0014-4886\(03\)00032-3](https://doi.org/10.1016/S0014-4886(03)00032-3)
- 919 D'Amato, F. R. (2021). Evaluation of  $\mu$ -opioid system functionality in mouse pups: Ultrasonic  
920 vocalizations as an index of infant attachment. In *Methods in Molecular Biology* (Vol. 2201,



- 921 pp. 259–265). Humana Press Inc. [https://doi.org/10.1007/978-1-0716-0884-5\\_24](https://doi.org/10.1007/978-1-0716-0884-5_24)
- 922 Darevsky, D., Gill, T. M., Vitale, K. R., Hu, B., Wegner, S. A., & Hopf, F. W. (2019). Drinking  
923 despite adversity: behavioral evidence for a head down and push strategy of conflict-  
924 resistant alcohol drinking in rats. *Addiction Biology*, 24(3), 426–437.  
925 <https://doi.org/10.1111/adb.12608>
- 926 De Vries, T. J., Van Vliet, B. J., Hogenboom, F., Wardeh, G., Van der Laan, J. W., Mulder, A.  
927 H., & Schoffelmeer, A. N. M. (1991). Effect of chronic prenatal morphine treatment on  $\mu$ -  
928 opioid receptor-regulated adenylate cyclase activity and neurotransmitter release in rat brain  
929 slices. *European Journal of Pharmacology: Molecular Pharmacology*, 208(2), 97–104.  
930 [https://doi.org/10.1016/0922-4106\(91\)90059-Q](https://doi.org/10.1016/0922-4106(91)90059-Q)
- 931 Dodge, N. C., Jacobson, J. L., & Jacobson, S. W. (2019, December 1). Effects of Fetal Substance  
932 Exposure on Offspring Substance Use. *Pediatric Clinics of North America*, Vol. 66, pp.  
933 1149–1161. W.B. Saunders. <https://doi.org/10.1016/j.pcl.2019.08.010>
- 934 Doleman, B., Leonardi-Bee, J., Heinink, T. P., Bhattacharjee, D., Lund, J. N., & Williams, J. P.  
935 (2018). Pre-emptive and preventive opioids for postoperative pain in adults undergoing all  
936 types of surgery. *Cochrane Database of Systematic Reviews*, 2018(12).  
937 <https://doi.org/10.1002/14651858.cd012624.pub2>
- 938 Dulor Finkler, A., Espinoza Pardo, G. V., & Bolten Lucion, A. (2020). Repeated cross-fostering  
939 affects maternal behavior and olfactory preferences in rat pups. *Developmental*  
940 *Psychobiology*, 62(3), 283–296. <https://doi.org/10.1002/dev.21907>
- 941 Dutriez-Casteloot, I., Bernet, F., Dedieu, J. F., Croix, D., Laborie, C., Montel, V., ... Dupouy, J.  
942 P. (1999). Hypothalamic-pituitary-adrenocortical and gonadal axes and sympathoadrenal  
943 activity of adult male rats prenatally exposed to morphine. *Neuroscience Letters*, 263(1), 1–

- 944 4. [https://doi.org/10.1016/S0304-3940\(99\)00086-5](https://doi.org/10.1016/S0304-3940(99)00086-5)
- 945 El-Kordi, A., Winkler, D., Hammerschmidt, K., Kästner, A., Krueger, D., Ronnenberg, A., ...  
946 Ehrenreich, H. (2013). Development of an autism severity score for mice using Nlgn4 null  
947 mutants as a construct-valid model of heritable monogenic autism. *Behavioural Brain*  
948 *Research*, 251, 41–49. <https://doi.org/10.1016/j.bbr.2012.11.016>
- 949 Eriksson, P. S., & Rönnbäck, L. (1989). Effects of prenatal morphine treatment of rats on  
950 mortality, bodyweight and analgesic response in the offspring. *Drug and Alcohol*  
951 *Dependence*, 24(3), 187–194. [https://doi.org/10.1016/0376-8716\(89\)90055-0](https://doi.org/10.1016/0376-8716(89)90055-0)
- 952 Esposito, G., Nakazawa, J., Venuti, P., & Bornstein, M. H. (2013). Componential deconstruction  
953 of infant distress vocalizations via tree-based models: A study of cry in autism spectrum  
954 disorder and typical development. *Research in Developmental Disabilities*, 34(9), 2717–  
955 2724. <https://doi.org/10.1016/j.ridd.2013.05.036>
- 956 FDA. (2019). *Enrichment Strategies for Clinical Trials to Support Determination of*  
957 *Effectiveness of Human Drugs and Biological Products. Guidance for Industry*. (March), 1–  
958 41. Retrieved from [https://www.fda.gov/regulatory-information/search-fda-guidance-](https://www.fda.gov/regulatory-information/search-fda-guidance-documents/enrichment-strategies-clinical-trials-support-approval-human-drugs-and-biological-products)  
959 [documents/enrichment-strategies-clinical-trials-support-approval-human-drugs-and-](https://www.fda.gov/regulatory-information/search-fda-guidance-documents/enrichment-strategies-clinical-trials-support-approval-human-drugs-and-biological-products)  
960 [biological-products](https://www.fda.gov/regulatory-information/search-fda-guidance-documents/enrichment-strategies-clinical-trials-support-approval-human-drugs-and-biological-products)
- 961 Ferraro, T. N., Golden, G. T., Smith, G. G., Martin, J. F., Schwebel, C. L., Doyle, G. A., ...  
962 Berrettini, W. H. (2005). Confirmation of a major QTL influencing oral morphine intake in  
963 C57 and DBA mice using reciprocal congenic strains. *Neuropsychopharmacology*, 30(4),  
964 742–746. <https://doi.org/10.1038/sj.npp.1300592>
- 965 Frances, B., Gout, R., Monsarrat, B., Cros, J., & Zajac, J. M. (1992). Further evidence that  
966 morphine-6 $\beta$ -glucuronide is a more potent opioid agonist than morphine. *Journal of*

- 967 *Pharmacology and Experimental Therapeutics*, 262(1), 25–31.
- 968 <https://doi.org/10.1097/00132586-199304000-00005>
- 969 Fujita-Hamabe, W., Nishida, M., Nawa, A., Kobori, T., Nakamoto, K., Kishioka, S., &  
970 Tokuyama, S. (2012). Etoposide modulates the effects of oral morphine analgesia by  
971 targeting the intestinal P-glycoprotein. *Journal of Pharmacy and Pharmacology*, 64(4),  
972 496–504. <https://doi.org/10.1111/j.2042-7158.2011.01426.x>
- 973 Gagin, R., Kook, N., Cohen, E., & Shavit, Y. (1997). Prenatal morphine enhances morphine-  
974 conditioned place preference in adult rats. *Pharmacology Biochemistry and Behavior*,  
975 58(2), 525–528. [https://doi.org/10.1016/S0091-3057\(97\)00281-5](https://doi.org/10.1016/S0091-3057(97)00281-5)
- 976 Gangitano, D., Salas, R., Teng, Y., Perez, E., & De Biasi, M. (2009). Progesterone modulation of  
977  $\alpha 5$  nAChR subunits influences anxiety-related behavior during estrus cycle. *Genes, Brain*  
978 *and Behavior*, 8(4), 398–406. <https://doi.org/10.1111/j.1601-183X.2009.00476.x>
- 979 Gauthier, A. C., Deangeli, N. E., & Bucci, D. J. (2015). Cross-fostering differentially affects  
980 ADHD-related behaviors in spontaneously hypertensive rats. *Developmental*  
981 *Psychobiology*, 57(2), 226–236. <https://doi.org/10.1002/dev.21286>
- 982 Gianoulakis, C. (2001). Influence of the endogenous opioid system on high alcohol consumption  
983 and genetic predisposition to alcoholism. *Journal of Psychiatry and Neuroscience*, Vol. 26,  
984 pp. 304–318. Canadian Medical Association. Retrieved from /pmc/articles/PMC167184/
- 985 Gianoulakis, C., Béliveau, D., Angelogianni, P., Meaney, M., Thavundayil, J., Tawar, V., &  
986 Dumas, M. (1989). Different pituitary  $\beta$ -endorphin and adrenal cortisol response to ethanol  
987 in individuals with high and low risk for future development of alcoholism. *Life Sciences*,  
988 45(12), 1097–1109. [https://doi.org/10.1016/0024-3205\(89\)90167-7](https://doi.org/10.1016/0024-3205(89)90167-7)
- 989 Glantz, M. D., & Chambers, J. C. (2006, July). Prenatal drug exposure effects on subsequent

990 vulnerability to drug abuse. *Development and Psychopathology*, Vol. 18, pp. 893–922.  
991 Cambridge University Press. <https://doi.org/10.1017/S0954579406060445>

992 Glick, S. D., Strumpf, A. J., & Zimmerberg, B. (1977). Effect of in utero administration of  
993 morphine on the subsequent development of self-administration behavior. *Brain Research*,  
994 *132*(1), 194–196. [https://doi.org/10.1016/0006-8993\(77\)90720-X](https://doi.org/10.1016/0006-8993(77)90720-X)

995 Goodwin, G. A., & Barr, G. A. (2005). Developmental changes in the behavioral and autonomic  
996 effects of kappa opioid receptor stimulation of the midbrain periaqueductal gray.  
997 *Developmental Psychobiology*, *46*(1), 47–56. <https://doi.org/10.1002/dev.20039>

998 Guyenet, S. J., Furrer, S. A., Damian, V. M., Baughan, T. D., la Spada, A. R., & Garden, G. A.  
999 (2010). A simple composite phenotype scoring system for evaluating mouse models of  
1000 cerebellar ataxia. *Journal of Visualized Experiments*, (39). <https://doi.org/10.3791/1787>

1001 Hahn, M. E., & Lavooy, M. J. (2005). A review of the methods of studies on infant ultrasound  
1002 production and maternal retrieval in small rodents. *Behavior Genetics*, *35*(1), 31–52. *Behav*  
1003 *Genet.* <https://doi.org/10.1007/s10519-004-0854-7>

1004 He, X., Bao, Y., Li, Y., & Sui, N. (2010). The effects of morphine at different embryonic ages on  
1005 memory consolidation and rewarding properties of morphine in day-old chicks.  
1006 *Neuroscience Letters*, *482*(1), 12–16. <https://doi.org/10.1016/j.neulet.2010.06.074>

1007 Holsapple, M. P., West, L. J., & Landreth, K. S. (2003, August 1). Species comparison of  
1008 anatomical and functional immune system development. *Birth Defects Research Part B -*  
1009 *Developmental and Reproductive Toxicology*, Vol. 68, pp. 321–334. John Wiley & Sons,  
1010 Ltd. <https://doi.org/10.1002/bdrb.10035>

1011 Hwa, L. S., Chu, A., Levinson, S. A., Kayyali, T. M., Debold, J. F., & Miczek, K. A. (2011).  
1012 Persistent escalation of alcohol drinking in C57BL/6J mice with intermittent access to 20%

- 1013 ethanol. *Alcoholism: Clinical and Experimental Research*, 35(11), 1938–1947.
- 1014 <https://doi.org/10.1111/j.1530-0277.2011.01545.x>
- 1015 Jiang, J., He, X., Wang, M. Y., & Sui, N. (2011). Early prenatal morphine exposure impairs  
1016 performance of learning tasks and attenuates in vitro heterosynaptic long-term potentiation  
1017 of intermediate medial mesopallium in day-old chicks. *Behavioural Brain Research*, 219(2),  
1018 363–366. <https://doi.org/10.1016/j.bbr.2010.12.034>
- 1019 Job, M. O., Tang, A., Hall, F. S., Sora, I., Uhl, G. R., Bergeson, S. E., & Gonzales, R. A. (2007).  
1020 Mu ( $\mu$ ) Opioid Receptor Regulation of Ethanol-Induced Dopamine Response in the Ventral  
1021 Striatum: Evidence of Genotype Specific Sexual Dimorphic Epistasis. *Biological*  
1022 *Psychiatry*, 62(6), 627–634. <https://doi.org/10.1016/j.biopsych.2006.11.016>
- 1023 Jóhannesson, T., & Becker, B. A. (1972). The Effects of Maternally–administered Morphine on  
1024 Rat Foetal Development and Resultant Tolerance to the Analgesic Effect of Morphine. *Acta*  
1025 *Pharmacologica et Toxicologica*, 31(4), 305–313. [https://doi.org/10.1111/j.1600-](https://doi.org/10.1111/j.1600-0773.1972.tb00686.x)  
1026 [0773.1972.tb00686.x](https://doi.org/10.1111/j.1600-0773.1972.tb00686.x)
- 1027 Jones, H. E., Kaltenbach, K., Heil, S. H., Stine, S. M., Coyle, M. G., Arria, A. M., ... Fischer, G.  
1028 (2010). Neonatal Abstinence Syndrome after Methadone or Buprenorphine Exposure. *New*  
1029 *England Journal of Medicine*, 363(24), 2320–2331. <https://doi.org/10.1056/nejmoa1005359>
- 1030 Kaltenbach, K., O’Grady, K. E., Heil, S. H., Salisbury, A. L., Coyle, M. G., Fischer, G., ...  
1031 Jones, H. E. (2018). Prenatal exposure to methadone or buprenorphine: Early childhood  
1032 developmental outcomes. *Drug and Alcohol Dependence*, 185, 40–49.  
1033 <https://doi.org/10.1016/j.drugalcdep.2017.11.030>
- 1034 Klausz, B., Pintér, O., Sobor, M., Gyarmati, Z., Fürst, Z., Tímár, J., & Zelena, D. (2011).  
1035 Changes in adaptability following perinatal morphine exposure in juvenile and adult rats.

- 1036 *European Journal of Pharmacology*, 654(2), 166–172.
- 1037 <https://doi.org/10.1016/j.ejphar.2010.11.025>
- 1038 Krishnan, A., Samtani, R., Dhanantwari, P., Lee, E., Yamada, S., Shiota, K., ... Lo, C. W.
- 1039 (2014). A detailed comparison of mouse and human cardiac development. *Pediatric*
- 1040 *Research*, 76(6), 500–507. <https://doi.org/10.1038/pr.2014.128>
- 1041 Kromkhun, P., Katou, M., Hashimoto, H., Terada, M., Moon, C., & Saito, T. R. (2013).
- 1042 Quantitative and qualitative analysis of rat pup ultrasonic vocalization sounds induced by a
- 1043 hypothermic stimulus. *Laboratory Animal Research*, 29(2), 77.
- 1044 <https://doi.org/10.5625/lar.2013.29.2.77>
- 1045 Kroon, T., van Hugte, E., van Linge, L., Mansvelder, H. D., & Meredith, R. M. (2019). Early
- 1046 postnatal development of pyramidal neurons across layers of the mouse medial prefrontal
- 1047 cortex. *Scientific Reports*, 9(1), 1–16. <https://doi.org/10.1038/s41598-019-41661-9>
- 1048 Labella, M. H., Eiden, R. D., Tabachnick, A. R., Sellers, T., & Dozier, M. (2021). Infant
- 1049 neurodevelopmental outcomes of prenatal opioid exposure and polysubstance use.
- 1050 *Neurotoxicology and Teratology*, 86, 107000. <https://doi.org/10.1016/j.ntt.2021.107000>
- 1051 Laborie, C., Dutriez-Casteloot, I., Montel, V., Dickès-Coopman, A., Lesage, J., & Vieau, D.
- 1052 (2005). Prenatal morphine exposure affects sympathoadrenal axis activity and serotonin
- 1053 metabolism in adult male rats both under basal conditions and after an ether inhalation
- 1054 stress. *Neuroscience Letters*, 381(3), 211–216. <https://doi.org/10.1016/j.neulet.2005.01.083>
- 1055 Lazic, S. E. (2012). Modeling hippocampal neurogenesis across the lifespan in seven species.
- 1056 *Neurobiology of Aging*, 33(8), 1664–1671.
- 1057 <https://doi.org/10.1016/j.neurobiolaging.2011.03.008>
- 1058 Lebow, M. A., Schroeder, M., Tsoory, M., Holzman-Karniel, D., Mehta, D., Ben-Dor, S., ...

- 1059           Chen, A. (2019). Glucocorticoid-induced leucine zipper “quantifies” stressors and increases  
1060           male susceptibility to PTSD. *Translational Psychiatry*, 9(1).  
1061           <https://doi.org/10.1038/s41398-019-0509-3>
- 1062           Leyenaar, J. K., Schaefer, A. P., Wasserman, J. R., Moen, E. L., O’Malley, A. J., & Goodman,  
1063           D. C. (2021). Infant Mortality Associated with Prenatal Opioid Exposure. *JAMA Pediatrics*,  
1064           175(7), 706–714. <https://doi.org/10.1001/jamapediatrics.2020.6364>
- 1065           Lingle, S., Wyman, M. T., Kotrba, R., Teichroeb, L. J., & Romanow, C. A. (2012). What makes  
1066           a cry a cry? A review of infant distress vocalizations. *Current Zoology*, Vol. 58, pp. 698–  
1067           726. <https://doi.org/10.1093/czoolo/58.5.698>
- 1068           Linsenbardt, D. N., & Boehm, S. L. (2014). Alterations in the rate of binge ethanol consumption:  
1069           Implications for preclinical studies in mice. *Addiction Biology*, 19(5), 812–825.  
1070           <https://doi.org/10.1111/adb.12052>
- 1071           Lipari, R. N., & Park-Lee, E. (2020). *Key Substance Use and Mental Health Indicators in the*  
1072           *United States: Results from the 2019 National Survey on Drug Use and Health*.
- 1073           Lugo, R. A., & Kern, S. E. (2002). Clinical pharmacokinetics of morphine. *Journal of Pain and*  
1074           *Palliative Care Pharmacotherapy*, Vol. 16, pp. 5–18.  
1075           [https://doi.org/10.1080/J354v16n04\\_02](https://doi.org/10.1080/J354v16n04_02)
- 1076           Madras, B. K., Han, B., Compton, W. M., Jones, C. M., Lopez, E. I., & McCance-Katz, E. F.  
1077           (2019). Associations of Parental Marijuana Use With Offspring Marijuana, Tobacco, and  
1078           Alcohol Use and Opioid Misuse. *JAMA Network Open*, 2(11), e1916015.  
1079           <https://doi.org/10.1001/jamanetworkopen.2019.16015>
- 1080           Maguire, D. J., Taylor, S., Armstrong, K., Shaffer-Hudkins, E., Germain, A. M., Brooks, S. S.,  
1081           ... Clark, L. (2016). Long-term outcomes of infants with neonatal abstinence syndrome.

- 1082 *Neonatal Network*, 35(5), 277–286. <https://doi.org/10.1891/0730-0832.35.5.277>
- 1083 Merhar, S. L., Parikh, N. A., Braimah, A., Poindexter, B. B., Tkach, J., & Kline-Fath, B. (2019).  
1084 White matter injury and structural anomalies in infants with prenatal opioid exposure.  
1085 *American Journal of Neuroradiology*, 40(12), 2161–2165.  
1086 <https://doi.org/10.3174/ajnr.A6282>
- 1087 Minnes, S., Lang, A., & Singer, L. (2011). Prenatal tobacco, marijuana, stimulant, and opiate  
1088 exposure: outcomes and practice implications. *Addiction Science & Clinical Practice*, Vol.  
1089 6, pp. 57–70.
- 1090 Moles, A., Kieffer, B. L., & D’Amato, F. R. (2004). Deficit in attachment behavior in mice  
1091 lacking the  $\mu$ -opioid receptor gene. *Science*, 304(5679), 1983–1986.  
1092 <https://doi.org/10.1126/science.1095943>
- 1093 Möller, C., Wolf, F., van Dijk, R. M., Di Liberto, V., Russmann, V., Keck, M., ... Potschka, H.  
1094 (2018). Toward evidence-based severity assessment in rat models with repeated seizures: I.  
1095 Electrical kindling. *Epilepsia*, 59(4), 765–777. <https://doi.org/10.1111/epi.14028>
- 1096 Muldoon, P. P., Jackson, K. J., Perez, E., Harenza, J. L., Molas, S., Rais, B., ... Damaj, M. I.  
1097 (2014). The  $\alpha 3\beta 4^*$  nicotinic ACh receptor subtype mediates physical dependence to  
1098 morphine: Mouse and human studies. *British Journal of Pharmacology*, 171(16), 3845–  
1099 3857. <https://doi.org/10.1111/bph.12741>
- 1100 Nasiraei-Moghadam, S., Sherafat, M. A., Safari, M. S., Moradi, F., Ahmadiani, A., & Dargahi,  
1101 L. (2013). Reversal of prenatal morphine exposure-induced memory deficit in male but not  
1102 female rats. *Journal of Molecular Neuroscience*, 50(1), 58–69.  
1103 <https://doi.org/10.1007/s12031-012-9860-z>
- 1104 Njung’e, K., & Handley, S. L. (1991). Effects of 5-HT uptake inhibitors, agonists and



- 1105 antagonists on the burying of harmless objects by mice; a putative test for anxiolytic agents.  
1106 *British Journal of Pharmacology*, 104(1), 105–112. <https://doi.org/10.1111/j.1476->  
1107 5381.1991.tb12392.x
- 1108 Nygaard, E., Slinning, K., Moe, V., Fjell, A., & Walhovd, K. B. (2020). Mental health in youth  
1109 prenatally exposed to opioids and poly-drugs and raised in permanent foster/adoptive  
1110 homes: A prospective longitudinal study. *Early Human Development*, 140, 104910.  
1111 <https://doi.org/10.1016/j.earlhumdev.2019.104910>
- 1112 Nygaard, E., Slinning, K., Moe, V., & Walhovd, K. B. (2017). Cognitive function of youths born  
1113 to mothers with opioid and poly-substance abuse problems during pregnancy. *Child*  
1114 *Neuropsychology*, 23(2), 159–187. <https://doi.org/10.1080/09297049.2015.1092509>
- 1115 O’Neal, T. J., Nooney, M. N., Thien, K., & Ferguson, S. M. (2020). Chemogenetic modulation  
1116 of accumbens direct or indirect pathways bidirectionally alters reinstatement of heroin-  
1117 seeking in high- but not low-risk rats. *Neuropsychopharmacology*, 45(8), 1251–1262.  
1118 <https://doi.org/10.1038/s41386-019-0571-9>
- 1119 Oslin, D. W., Berrettini, W. H., & O’Brien, C. P. (2006, September 1). Targeting treatments for  
1120 alcohol dependence: The pharmacogenetics of naltrexone. *Addiction Biology*, Vol. 11, pp.  
1121 397–403. John Wiley & Sons, Ltd. <https://doi.org/10.1111/j.1369-1600.2006.00036.x>
- 1122 Ostrea, E. M., Ostrea, A. R., & Simpson, P. M. (1997). Mortality within the first 2 years in  
1123 infants exposed to cocaine, opiate, or cannabinoid during gestation. *Pediatrics*, 100(1), 79–  
1124 83. <https://doi.org/10.1542/peds.100.1.79>
- 1125 Parga, J. J., Lewin, S., Lewis, J., Montoya-Williams, D., Alwan, A., Shaul, B., ... Anderson, A.  
1126 E. (2020). Defining and distinguishing infant behavioral states using acoustic cry analysis:  
1127 is colic painful? *Pediatric Research*, 87(3), 576–580. <https://doi.org/10.1038/s41390-019->

- 1128 0592-4
- 1129 Peleg-Oren, N., & Teichman, M. (2006, July 25). Young children of parents with Substance Use  
1130 Disorders (SUD): A review of the literature and implications for social work practice.  
1131 *Journal of Social Work Practice in the Addictions*, Vol. 6, pp. 49–61.  
1132 [https://doi.org/10.1300/J160v06n01\\_03](https://doi.org/10.1300/J160v06n01_03)
- 1133 Pereira de Souza Goldim, M., Della Giustina, A., Mathias, K., de Oliveira Junior, A., Fileti, M.  
1134 E., De Carli, R., ... Petronilho, F. (2020). Sickness Behavior Score Is Associated with  
1135 Neuroinflammation and Late Behavioral Changes in Polymicrobial Sepsis Animal Model.  
1136 *Inflammation*, 43(3), 1019–1034. <https://doi.org/10.1007/s10753-020-01187-z>
- 1137 Perez, E. E., & De Biasi, M. (2015). Assessment of affective and somatic signs of ethanol  
1138 withdrawal in C57BL/6J mice using a short-term ethanol treatment. *Alcohol (Fayetteville,*  
1139 *N.Y.)*, 49(3), 237–243. <https://doi.org/10.1016/j.alcohol.2015.02.003>
- 1140 Perez, E., Quijano-Cardé, N., & De Biasi, M. (2015). Nicotinic Mechanisms Modulate Ethanol  
1141 Withdrawal and Modify Time Course and Symptoms Severity of Simultaneous Withdrawal  
1142 from Alcohol and Nicotine. *Neuropsychopharmacology*, 40, 2327–2336.  
1143 <https://doi.org/10.1038/npp.2015.80>
- 1144 Piazza, P. V., & Le Moal, M. (1997, December). Glucocorticoids as a biological substrate of  
1145 reward: Physiological and pathophysiological implications. *Brain Research Reviews*, Vol.  
1146 25, pp. 359–372. *Brain Res Brain Res Rev*. [https://doi.org/10.1016/S0165-0173\(97\)00025-8](https://doi.org/10.1016/S0165-0173(97)00025-8)
- 1147 Piccotti, L., Voigtman, B., Vongsa, R., Nellhaus, E. M., Rodriguez, K. J., Davies, T. H., &  
1148 Quirk, S. (2019, May 1). Neonatal Opioid Withdrawal Syndrome: A Developmental Care  
1149 Approach. *Neonatal Network : NN*, Vol. 38, pp. 160–169. NLM (Medline).  
1150 <https://doi.org/10.1891/0730-0832.38.3.160>

- 1151 Pinelli, A., & Trivulzio, S. (1997). Quantitative evaluation of opioid withdrawal signs in rats  
1152 repeatedly treated with morphine and injected with naloxone, in the absence or presence of  
1153 the antiabstinence agent clonidine. *Journal of Pharmacological and Toxicological Methods*,  
1154 38(3), 117–131. [https://doi.org/10.1016/S1056-8719\(97\)00050-6](https://doi.org/10.1016/S1056-8719(97)00050-6)
- 1155 Quijano Cardé, N. A., & De Biasi, M. (2022). Behavioral characterization of withdrawal  
1156 following chronic voluntary ethanol consumption via intermittent two-bottle choice points  
1157 to different susceptibility categories. *Alcoholism: Clinical and Experimental Research*.  
1158 <https://doi.org/10.1111/acer.14785>
- 1159 Quijano Cardé, N. A., Perez, E. E., Feinn, R., Kranzler, H. R., & De Biasi, M. (2021).  
1160 Antagonism of GluK1-containing kainate receptors reduces ethanol consumption by  
1161 modulating ethanol reward and withdrawal. *Neuropharmacology*, 199, 108783.  
1162 <https://doi.org/10.1016/j.neuropharm.2021.108783>
- 1163 Ramsey, N. F., Niesink, R. J. M., & Van Ree, J. M. (1993). Prenatal exposure to morphine  
1164 enhances cocaine and heroin self-administration in drug-naive rats. *Drug and Alcohol*  
1165 *Dependence*, 33(1), 41–51. [https://doi.org/10.1016/0376-8716\(93\)90032-L](https://doi.org/10.1016/0376-8716(93)90032-L)
- 1166 Rhodes, J. S., Ford, M. M., Yu, C.-H., Brown, L. L., Finn, D. A., Garland, T., & Crabbe, J. C.  
1167 (2007). Mouse inbred strain differences in ethanol drinking to intoxication. *Genes, Brain*  
1168 *and Behavior*, 6(1), 1–18. <https://doi.org/10.1111/j.1601-183X.2006.00210.x>
- 1169 Rice, D., & Barone, S. (2000). Critical periods of vulnerability for the developing nervous  
1170 system: Evidence from humans and animal models. *Environmental Health Perspectives*,  
1171 108(SUPPL. 3), 511–533. <https://doi.org/10.1289/ehp.00108s3511>
- 1172 Richard, S., & Flamant, F. (2018, May 28). Regulation of T3 availability in the developing brain:  
1173 The mouse genetics contribution. *Frontiers in Endocrinology*, Vol. 9, p. 1. Frontiers Media

- 1174 S.A. <https://doi.org/10.3389/fendo.2018.00265>
- 1175 Rimanóczy, Á., Šlamberová, R., Riley, M. A., & Vathy, I. (2003). Adrenocorticotropin stress  
1176 response but not glucocorticoid-negative feedback is altered by prenatal morphine exposure  
1177 in adult male rats. *Neuroendocrinology*, 78(6), 312–320. <https://doi.org/10.1159/000074884>
- 1178 Rohbani, K., Sabzevari, S., Sadat-Shirazi, M. S., Nouri Zadeh-Tehrani, S., Ashabi, G., Khalifeh,  
1179 S., ... Zarrindast, M. R. (2019). Parental morphine exposure affects repetitive grooming  
1180 actions and marble burying behavior in the offspring: Potential relevance for obsessive-  
1181 compulsive like behavior. *European Journal of Pharmacology*, 865.  
1182 <https://doi.org/10.1016/j.ejphar.2019.172757>
- 1183 Ross, E. J., Graham, D. L., Money, K. M., & Stanwood, G. D. (2015). Developmental  
1184 consequences of fetal exposure to drugs: What we know and what we still must learn.  
1185 *Neuropsychopharmacology*, Vol. 40, pp. 61–87. <https://doi.org/10.1038/npp.2014.147>
- 1186 Sabzevari, S., Rohbani, K., Sadat-Shirazi, M. S., Babhadi-Ashar, N., Shakeri, A., Ashabi, G., ...  
1187 Zarrindast, M. R. (2019). Morphine exposure before conception affects anxiety-like  
1188 behavior and CRF level (in the CSF and plasma) in the adult male offspring. *Brain*  
1189 *Research Bulletin*, 144, 122–131. <https://doi.org/10.1016/j.brainresbull.2018.11.022>
- 1190 Sadat-Shirazi, M. S., Karimi, F., Kaka, G., Ashabi, G., Ahmadi, I., Akbarabadi, A., ...  
1191 Zarrindast, M. R. (2019). Parental morphine exposure enhances morphine (but not  
1192 methamphetamine) preference and increases monoamine oxidase-B level in the nucleus  
1193 accumbens. *Behavioural Pharmacology*, 30(5), 435–445.  
1194 <https://doi.org/10.1097/FBP.0000000000000465>
- 1195 Salas, R., Main, A., Gangitano, D. A., Zimmerman, G., Ben-Ari, S., Soreq, H., & De Biasi, M.  
1196 (2008). Nicotine relieves anxiogenic-like behavior in mice that overexpress the read-

- 1197 through variant of acetylcholinesterase but not in wild-type mice. *Molecular Pharmacology*,  
1198 74(6), 1641–1648. <https://doi.org/10.1124/mol.108.048454>
- 1199 Salas, Ramiro, Main, A., Gangitano, D., & De Biasi, M. (2007). Decreased withdrawal  
1200 symptoms but normal tolerance to nicotine in mice null for the  $\alpha 7$  nicotinic acetylcholine  
1201 receptor subunit. *Neuropharmacology*, 53(7), 863–869.  
1202 <https://doi.org/10.1016/j.neuropharm.2007.08.017>
- 1203 Salas, Ramiro, Pieri, F., Fung, B., Dani, J. A., & De Biasi, M. (2003). Altered anxiety-related  
1204 responses in mutant mice lacking the  $\beta 4$  subunit of the nicotinic receptor. *Journal of*  
1205 *Neuroscience*, 23(15), 6255–6263. <https://doi.org/10.1523/jneurosci.23-15-06255.2003>
- 1206 Salling, M. C., Skelly, M. J., Avegno, E., Regan, S., Zeric, T., Nichols, E., & Harrison, N. L.  
1207 (2018). Alcohol consumption during adolescence in a mouse model of binge drinking alters  
1208 the intrinsic excitability and function of the prefrontal cortex through a reduction in the  
1209 hyperpolarization-activated cation current. *Journal of Neuroscience*, 38(27), 6207–6222.  
1210 <https://doi.org/10.1523/JNEUROSCI.0550-18.2018>
- 1211 Santangeli, O., Lehtikuja, H., Palomäki, E., Wigren, H. K., Paunio, T., & Porkka-Heiskanen, T.  
1212 (2016). Sleep and behavior in cross-fostering rats: Developmental and sex aspects. *Sleep*,  
1213 39(12), 2211–2221. <https://doi.org/10.5665/sleep.6328>
- 1214 Sarfi, M., Eikemo, M., Welle-Strand, G. K., Muller, A. E., & Lehmann, S. (2021). Mental health  
1215 and use of health care services in opioid-exposed school-aged children compared to foster  
1216 children. *European Child and Adolescent Psychiatry*, 1, 3. [https://doi.org/10.1007/s00787-](https://doi.org/10.1007/s00787-021-01728-3)  
1217 [021-01728-3](https://doi.org/10.1007/s00787-021-01728-3)
- 1218 Sarkar, D. K. (2015). Fetal alcohol exposure increases susceptibility to carcinogenesis and  
1219 promotes tumor progression in prostate gland. In *Advances in Experimental Medicine and*

- 1220 *Biology* (Vol. 815, pp. 389–402). Springer New York LLC. <https://doi.org/10.1007/978-3->  
1221 319-09614-8\_23
- 1222 Schindler, C. J., Šlamberová, R., Rimanóczy, A., Hnactzuk, O. C., Riley, M. A., & Vathy, I.  
1223 (2004). Field-specific changes in hippocampal opioid mRNA, peptides, and receptors due to  
1224 prenatal morphine exposure in adult male rats. *Neuroscience*, *126*(2), 355–364.  
1225 <https://doi.org/10.1016/j.neuroscience.2004.03.040>
- 1226 Semple, B. D., Blomgren, K., Gimlin, K., Ferriero, D. M., & Noble-Haeusslein, L. J. (2013, July  
1227 1). Brain development in rodents and humans: Identifying benchmarks of maturation and  
1228 vulnerability to injury across species. *Progress in Neurobiology*, Vol. 106–107, pp. 1–16.  
1229 Pergamon. <https://doi.org/10.1016/j.pneurobio.2013.04.001>
- 1230 Shahi, S. K., Freedman, S. N., Dahl, R. A., Karandikar, N. J., & Mangalam, A. K. (2019).  
1231 Scoring disease in an animal model of multiple sclerosis using a novel infrared-based  
1232 automated activity-monitoring system. *Scientific Reports*, *9*(1), 1–11.  
1233 <https://doi.org/10.1038/s41598-019-55713-7>
- 1234 Shen, Y. L., Chen, S. T., Chan, T. Y., Hung, T. W., Tao, P. L., Liao, R. M., ... Chen, H. H.  
1235 (2016). Delayed extinction and stronger drug-primed reinstatement of methamphetamine  
1236 seeking in rats prenatally exposed to morphine. *Neurobiology of Learning and Memory*,  
1237 *128*, 56–64. <https://doi.org/10.1016/j.nlm.2015.12.002>
- 1238 Siddiqui, A., Haq, S., & Shah, B. H. (1997). Perinatal exposure to morphine disrupts brain  
1239 norepinephrine, ovarian cyclicity, and sexual receptivity in rats. *Pharmacology*  
1240 *Biochemistry and Behavior*, *58*(1), 243–248. [https://doi.org/10.1016/S0091-3057\(97\)00012-](https://doi.org/10.1016/S0091-3057(97)00012-9)  
1241 9
- 1242 Sinclair, D., Purves-Tyson, T. D., Allen, K. M., & Weickert, C. S. (2014). Impacts of stress and

- 1243 sex hormones on dopamine neurotransmission in the adolescent brain.  
1244 *Psychopharmacology*, Vol. 231, pp. 1581–1599. Springer Verlag.  
1245 <https://doi.org/10.1007/s00213-013-3415-z>
- 1246 Siu, A., & Robinson, C. A. (2014). Neonatal abstinence syndrome: essentials for the practitioner.  
1247 *The Journal of Pediatric Pharmacology and Therapeutics : JPPT : The Official Journal of*  
1248 *PPAG*, 19(3), 147–155. <https://doi.org/10.5863/1551-6776-19.3.147>
- 1249 Skumlien, M., Ibsen, I. O., Kesmodel, U. S., & Nygaard, E. (2020). Sex Differences in Early  
1250 Cognitive Development after Prenatal Exposure to Opioids. *Journal of Pediatric*  
1251 *Psychology*, 45(5), 475–485. <https://doi.org/10.1093/jpepsy/jsaa008>
- 1252 Šlamberová, R., Hrubá, L., Bernášková, K., Matějovská, I., & Rokyta, R. (2010). Effect of cross-  
1253 fostering on seizures in adult male offspring of methamphetamine-treated rat mothers.  
1254 *International Journal of Developmental Neuroscience*, 28(6), 429–435.  
1255 <https://doi.org/10.1016/j.ijdevneu.2010.06.009>
- 1256 Šlamberová, Romana, Rimanóczy, Á., Riley, M. A., & Vathya, I. (2004). Hypothalamo-  
1257 pituitary-adrenal axis-regulated stress response and negative feedback sensitivity is altered  
1258 by prenatal morphine exposure in adult female rats. *Neuroendocrinology*, 80(3), 192–200.  
1259 <https://doi.org/10.1159/000082359>
- 1260 Sobor, M., Timár, J., Riba, P., Király, K. P., Gyarmati, S., Al-Khrasani, M., & Fürst, S. (2010).  
1261 Does the effect of morphine challenge change on maternal behaviour of dams chronically  
1262 treated with morphine during gestation and further on during lactation? *Pharmacology*  
1263 *Biochemistry and Behavior*, 95(3), 367–374. <https://doi.org/10.1016/j.pbb.2010.02.015>
- 1264 St. Marie, B., Coleman, L., Vignato, J. A., Arndt, S., & Segre, L. S. (2020). Use and Misuse of  
1265 Opioid Pain Medications by Pregnant and Nonpregnant Women. *Pain Management*

- 1266        *Nursing*, 21(1), 90–93. <https://doi.org/10.1016/j.pmn.2019.05.002>
- 1267    Tan, J. W., Duan, T. T., Zhou, Q. X., Ding, Z. Y., Jing, L., Cao, J., ... Xu, L. (2015). Impaired  
1268        contextual fear extinction and hippocampal synaptic plasticity in adult rats induced by  
1269        prenatal morphine exposure. *Addiction Biology*, 20(4), 652–662.  
1270        <https://doi.org/10.1111/adb.12158>
- 1271    Tarter, R. E., Kirisci, L., Cochran, G., Seybert, A., Reynolds, M., & Vanyukov, M. (2020).  
1272        Forecasting Opioid Use Disorder at 25 Years of Age in 16-Year-Old Adolescents. *Journal*  
1273        *of Pediatrics*, 225, 207-213.e1. <https://doi.org/10.1016/j.jpeds.2020.07.025>
- 1274    Timár, J., Sobor, M., Király, K. P., Gyarmati, S., Riba, P., Al-Khrasani, M., & Fürst, S. (2010).  
1275        Peri, pre and postnatal morphine exposure: Exposure-induced effects and sex differences in  
1276        the behavioural consequences in rat offspring. *Behavioural Pharmacology*, 21(1), 58–68.  
1277        <https://doi.org/10.1097/FBP.0b013e3283359f39>
- 1278    Tschida, K., Michael, V., Takatoh, J., Han, B. X., Zhao, S., Sakurai, K., ... Wang, F. (2019). A  
1279        Specialized Neural Circuit Gates Social Vocalizations in the Mouse. *Neuron*, 103(3), 459-  
1280        472.e4. <https://doi.org/10.1016/j.neuron.2019.05.025>
- 1281    Van Cruchten, S., Vrolyk, V., Perron Lepage, M.-F., Baudon, M., Voute, H., Schoofs, S., ...  
1282        Allegaert, K. (2017). Pre- and Postnatal Development of the Eye: A Species Comparison.  
1283        *Birth Defects Research*, 109(19), 1540–1567. <https://doi.org/10.1002/bdr2.1100>
- 1284    Vathy, I., Šlamberová, R., & Liu, X. (2007). Foster mother care but not prenatal morphine  
1285        exposure enhances cocaine self-administration in young adult male and female rats.  
1286        *Developmental Psychobiology*, 49(5), 463–473. <https://doi.org/10.1002/dev.20240>
- 1287    Vathy, Ilona, Šlamberová, R., Rimanóczy, Á., Riley, M. A., & Bar, N. (2003). Autoradiographic  
1288        evidence that prenatal morphine exposure sex-dependently alters  $\mu$ -opioid receptor densities



- 1289 in brain regions that are involved in the control of drug abuse and other motivated  
1290 behaviors. *Progress in Neuro-Psychopharmacology and Biological Psychiatry*, 27(3), 381–  
1291 393. [https://doi.org/10.1016/S0278-5846\(02\)00355-X](https://doi.org/10.1016/S0278-5846(02)00355-X)
- 1292 Vousooghi, N., Sadat-Shirazi, M. S., Safavi, P., Zeraati, R., Akbarabadi, A., Makki, S. M., ...  
1293 Zarrindast, M. R. (2018). Adult rat morphine exposure changes morphine preference,  
1294 anxiety, and the brain expression of dopamine receptors in male offspring. *International*  
1295 *Journal of Developmental Neuroscience*, 69, 49–59.  
1296 <https://doi.org/10.1016/j.ijdevneu.2018.06.008>
- 1297 Wang, Y., Yao, Y., Li, Y., Nie, H., & He, X. (2017). Prenatal morphine exposure during late  
1298 embryonic stage enhances the rewarding effects of morphine and induces the loss of  
1299 membrane-bound protein kinase C- $\alpha$  in intermediate medial mesopallium in the chick.  
1300 *Neuroscience Letters*, 639, 25–30. <https://doi.org/10.1016/j.neulet.2016.12.030>
- 1301 Wasz-Höckert, O., Michelsson, K., & Lind, J. (1985). Twenty-Five Years of Scandinavian Cry  
1302 Research. In *Infant Crying* (pp. 83–104). Springer US. [https://doi.org/10.1007/978-1-4613-](https://doi.org/10.1007/978-1-4613-2381-5_4)  
1303 [2381-5\\_4](https://doi.org/10.1007/978-1-4613-2381-5_4)
- 1304 Weller, A. E., Crist, R. C., Reiner, B. C., Doyle, G. A., & Berrettini, W. H. (2020). Neonatal  
1305 Opioid Withdrawal Syndrome (NOWS): A Transgenerational Echo of the Opioid Crisis.  
1306 *Cold Spring Harbor Perspectives in Medicine*, a039669.  
1307 <https://doi.org/10.1101/cshperspect.a039669>
- 1308 Wiedenmayer, C. P., Goodwin, G. A., & Barr, G. A. (2000). The effect of periaqueductal gray  
1309 lesions on responses to age-specific threats in infant rats. *Developmental Brain Research*,  
1310 120(2), 191–198. [https://doi.org/10.1016/S0165-3806\(00\)00009-2](https://doi.org/10.1016/S0165-3806(00)00009-2)
- 1311 Wilcox, M. V., Carlson, V. C. C., Sherazee, N., Sprow, G. M., Bock, R., Thiele, T. E., ...

- 1312 Alvarez, V. A. (2014). Repeated Binge-like ethanol drinking alters ethanol drinking patterns  
1313 and depresses striatal GABAergic transmission. *Neuropsychopharmacology*, *39*(3), 579–  
1314 594. <https://doi.org/10.1038/npp.2013.230>
- 1315 Wu, L. Y., Chen, J. F., Tao, P. L., & Huang, E. Y. K. (2009). Attenuation by dextromethorphan  
1316 on the higher liability to morphine-induced reward, caused by prenatal exposure of  
1317 morphine in rat offspring. *Journal of Biomedical Science*, *16*(1), 106.  
1318 <https://doi.org/10.1186/1423-0127-16-106>
- 1319 Wu, P. L., Yang, Y. N., Suen, J. L., Yang, Y. C. S. H., Yang, C. H., & Yang, S. N. (2018). Long-  
1320 Lasting Alterations in Gene Expression of Postsynaptic Density 95 and Inotropic  
1321 Glutamatergic Receptor Subunit in the Mesocorticolimbic System of Rat Offspring Born to  
1322 Morphine-Addicted Mothers. *BioMed Research International*, *2018*.  
1323 <https://doi.org/10.1155/2018/5437092>
- 1324 Yang, S. N., Huang, L. T., Wang, C. L., Chen, W. F., Yang, C. H., Lin, S. Z., ... Tao, P. L.  
1325 (2003). Prenatal administration of morphine decreases CREBSerine-133 phosphorylation  
1326 and synaptic plasticity range mediated by glutamatergic transmission in the hippocampal  
1327 CA1 area of cognitive-deficient rat offspring. *Hippocampus*, *13*(8), 915–921.  
1328 <https://doi.org/10.1002/hipo.10137>
- 1329 Yeoh, S. L., Eastwood, J., Wright, I. M., Morton, R., Melhuish, E., Ward, M., & Oei, J. L.  
1330 (2019). Cognitive and Motor Outcomes of Children with Prenatal Opioid Exposure: A  
1331 Systematic Review and Meta-analysis. *JAMA Network Open*, *2*(7).  
1332 <https://doi.org/10.1001/jamanetworkopen.2019.7025>
- 1333 Zanni, G., Robinson-Drummer, P. A., Dougher, A. A., Deutsch, H. M., DeSalle, M. J., Teplitzky,  
1334 D., ... Barr, G. A. (2021). Maternal continuous oral oxycodone self-administration alters

1335 pup affective/social communication but not spatial learning or sensory-motor function.

1336 *Drug and Alcohol Dependence*, 221, 108628.

1337 <https://doi.org/10.1016/j.drugalcdep.2021.108628>

1338 Zhu, H., & Barr, G. A. (2004). The role of AMPA and metabotropic glutamate receptors on

1339 morphine withdrawal in infant rats. *International Journal of Developmental Neuroscience*,

1340 22(5–6), 379–395. <https://doi.org/10.1016/j.ijdevneu.2004.06.005>

1341

1342

1343 **Figures:**  
 1344  
 1345 **Figure 1:**  
 1346

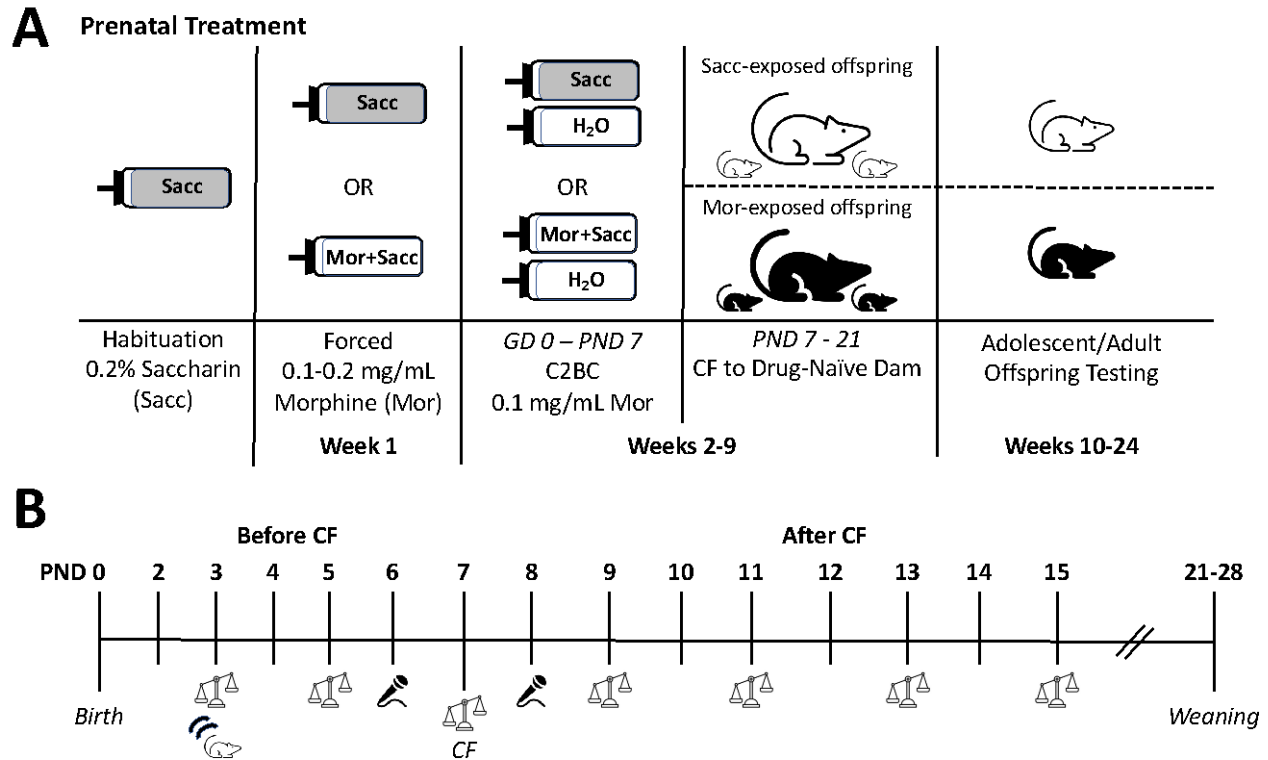

1347  
 1348  
 1349

1350 **Figure 2:**  
1351

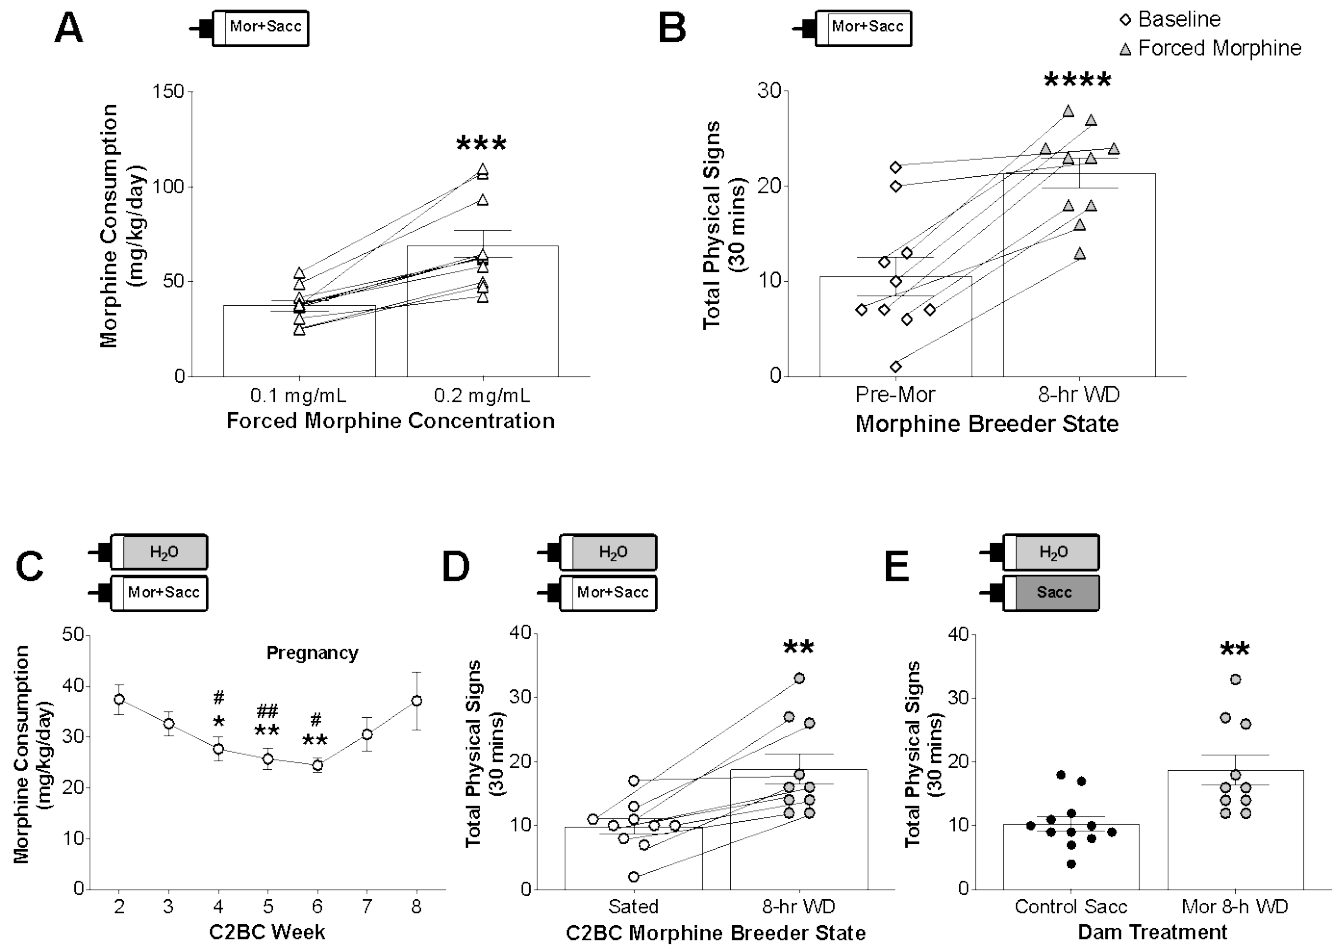

1352  
1353

1354  
1355

**Figure 3:**

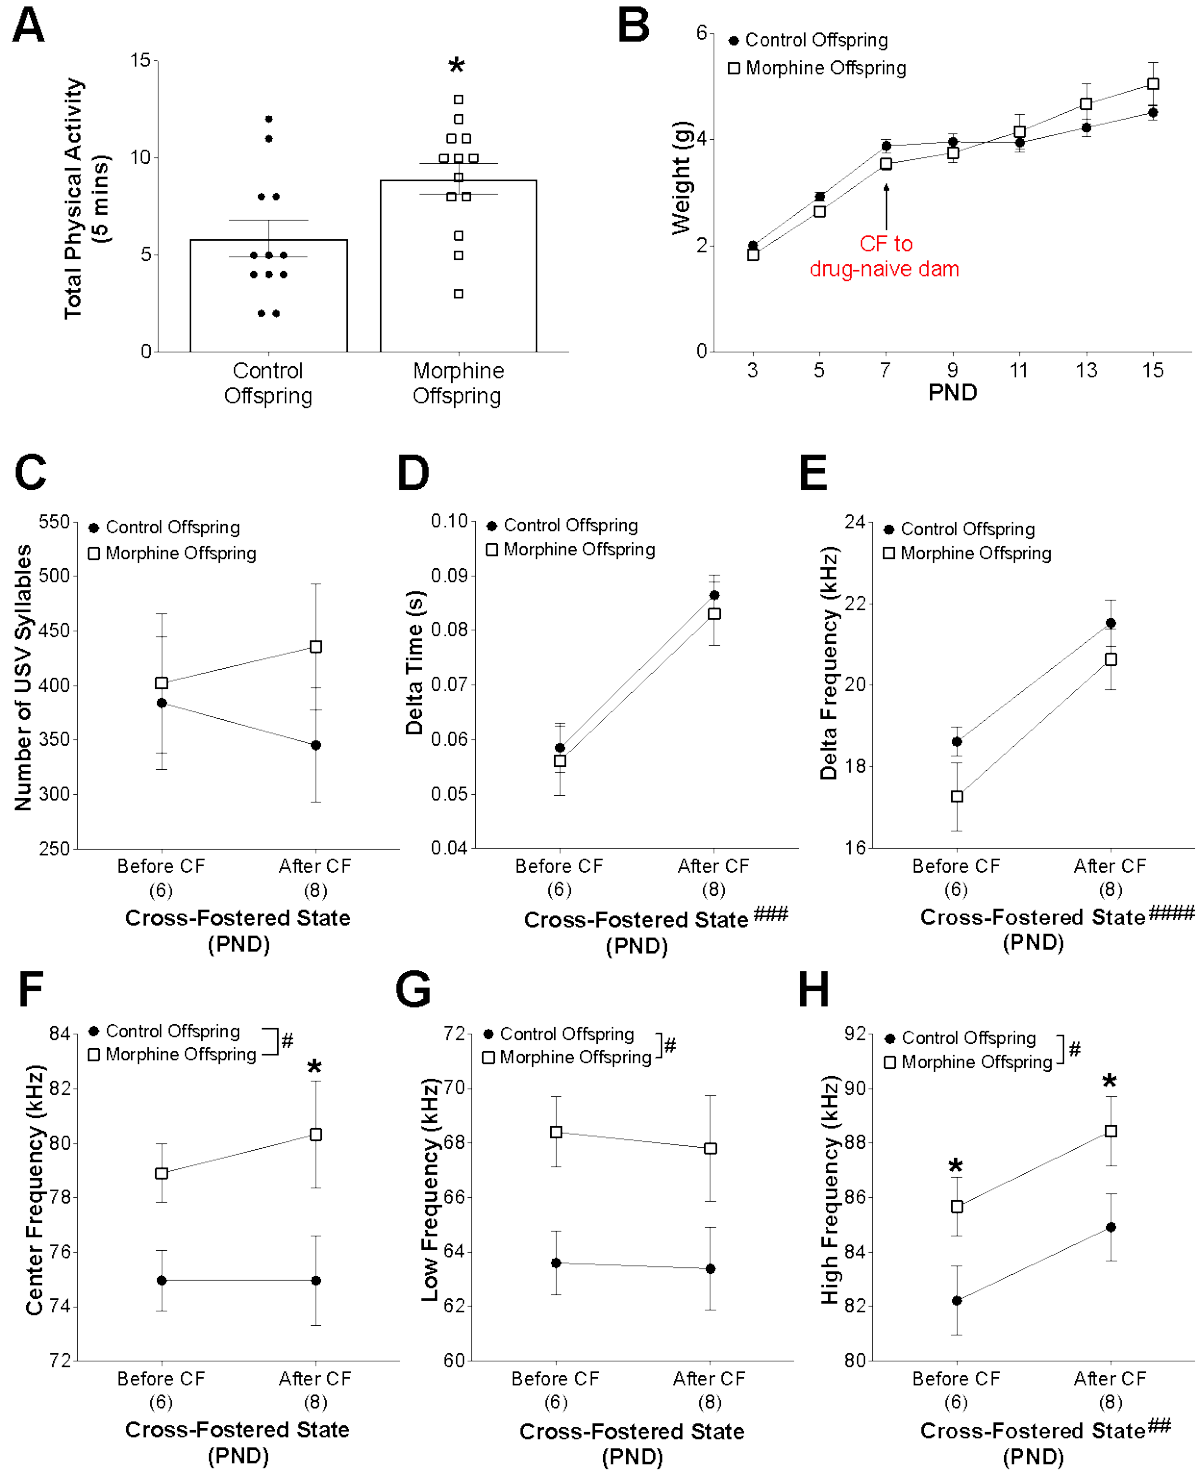

1356  
1357

1358  
1359

**Figure 4:**

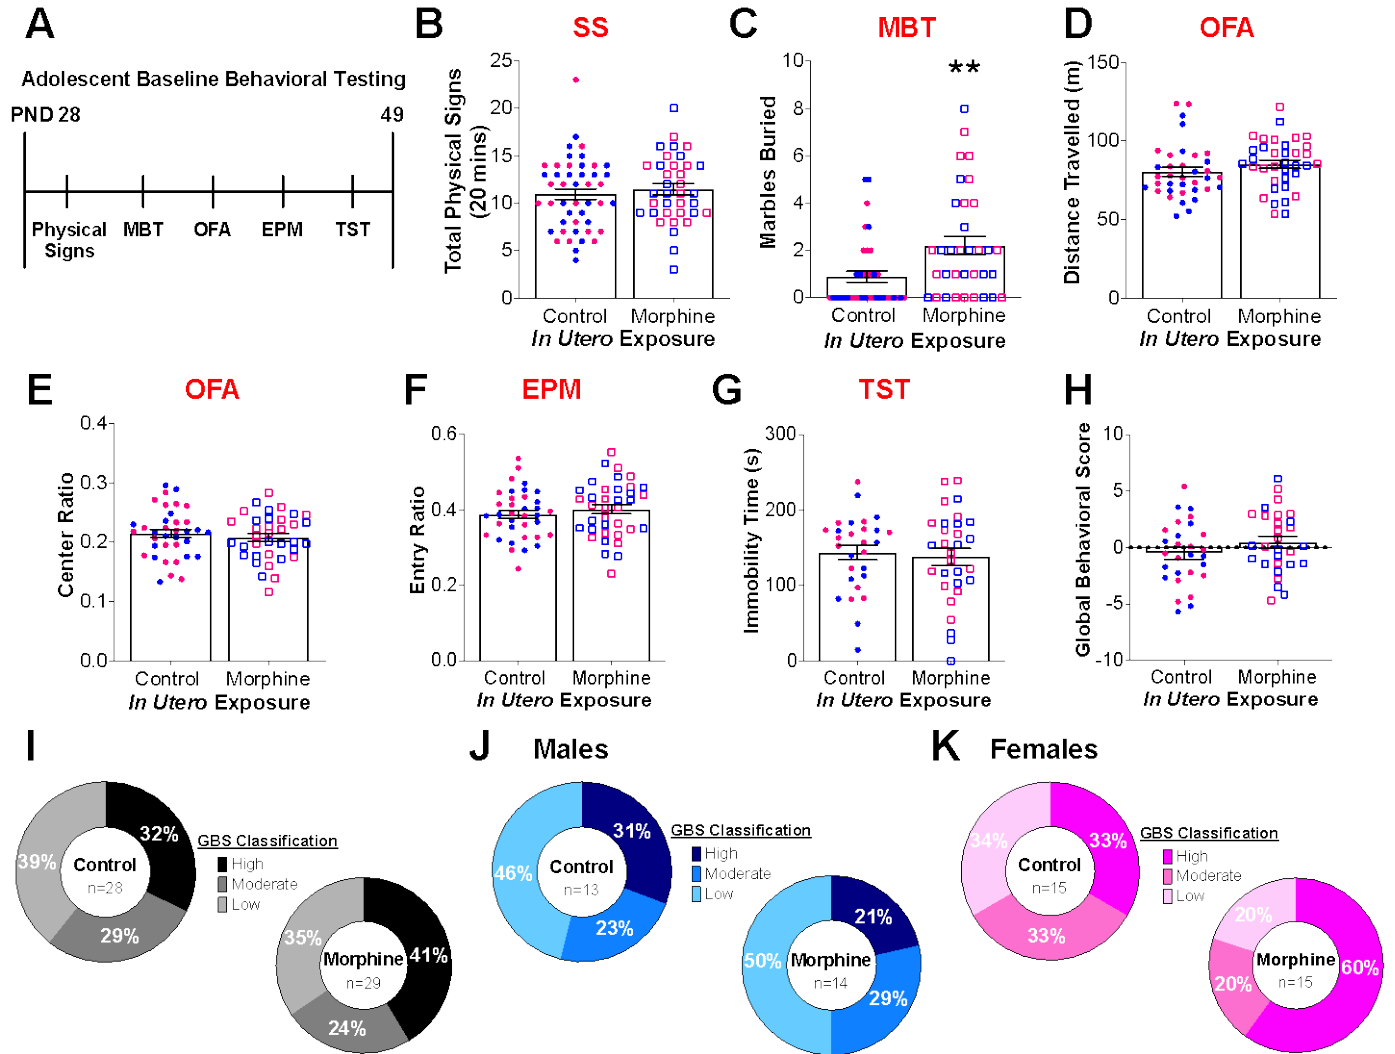

1360  
1361

1362  
1363

**Figure 5:**

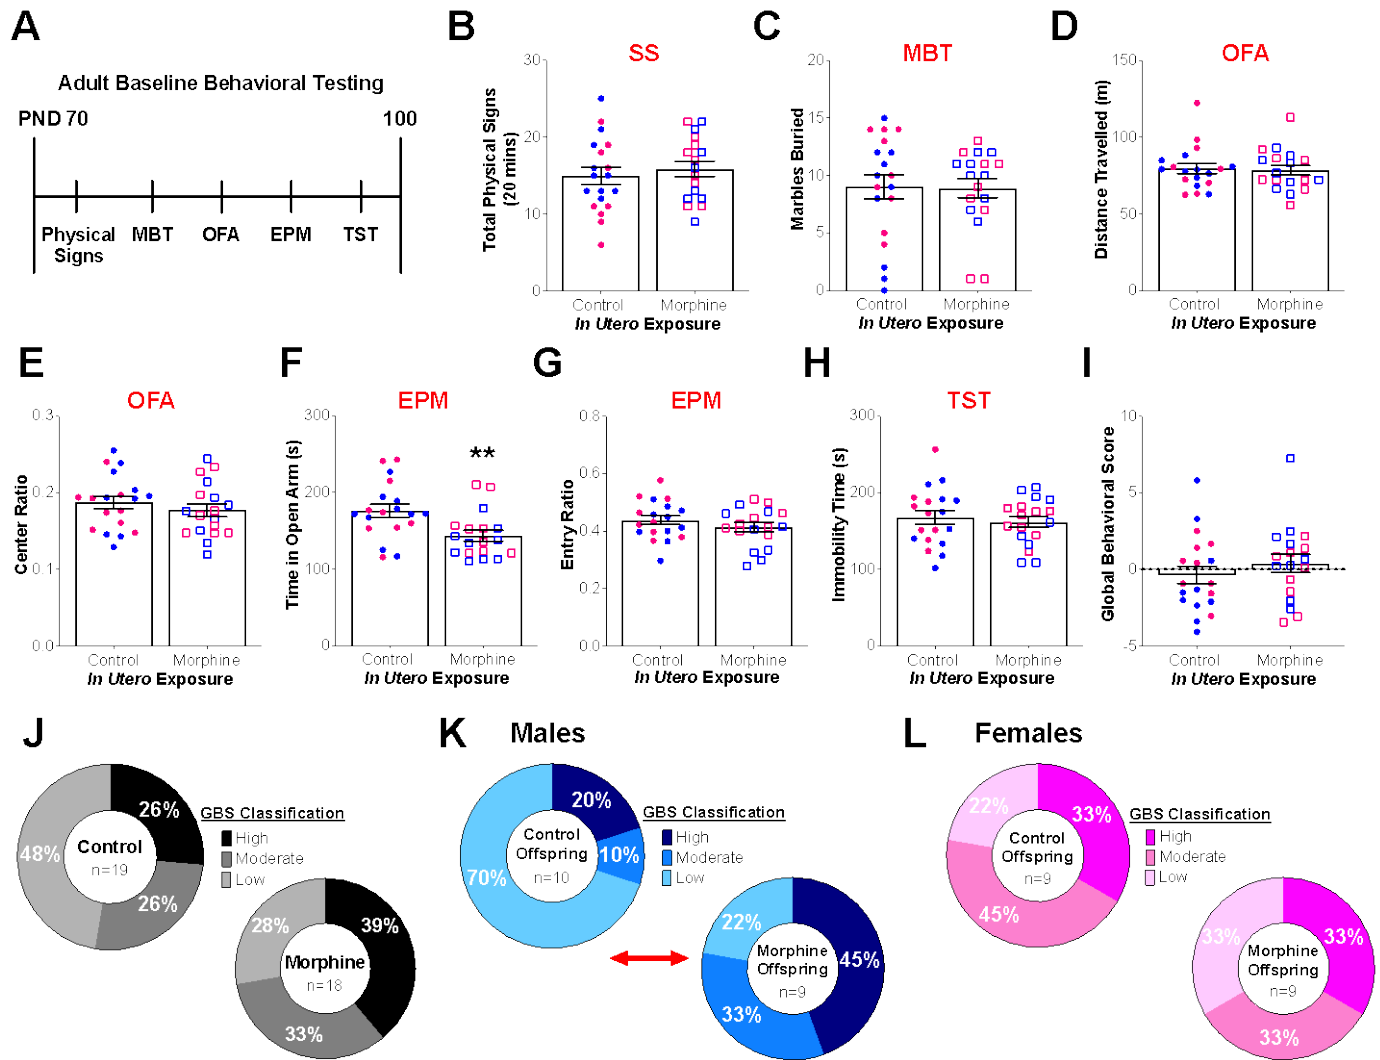

1364  
1365



1366  
1367

**Figure 6:**

**A**

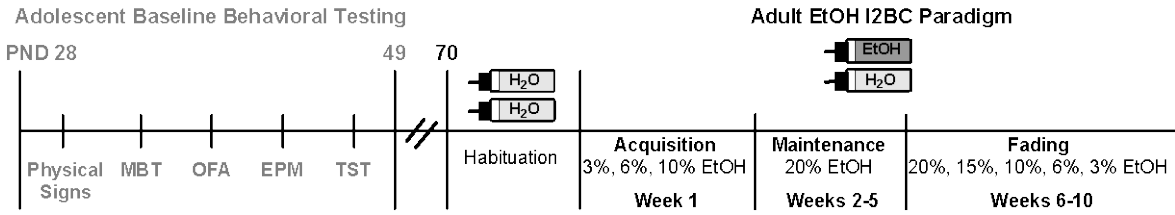

**B**

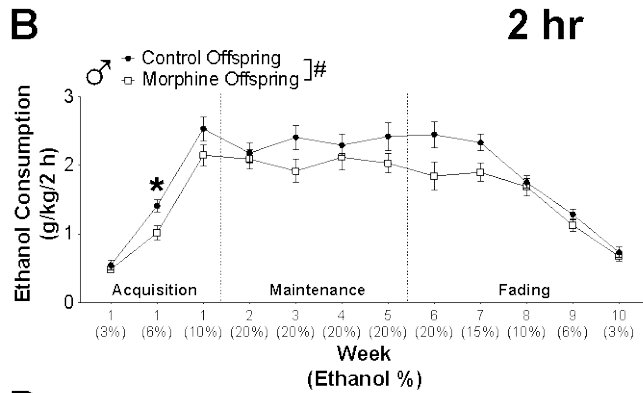

**C**

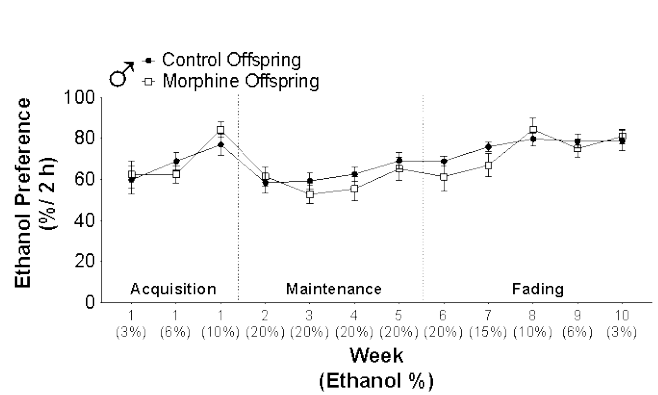

**D**

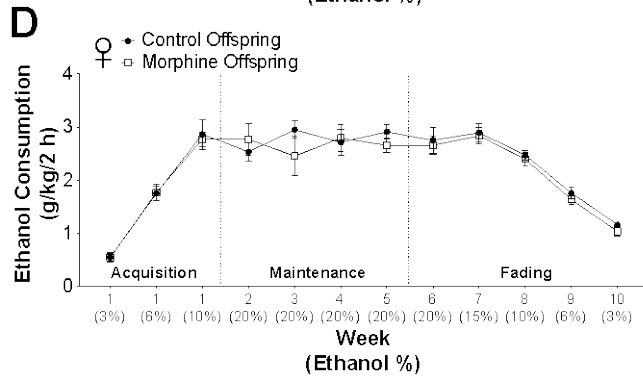

**E**

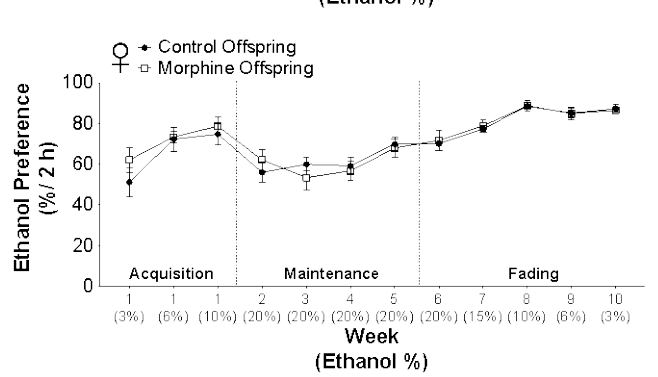

1368

1369 **Figure legends:**

1370

1371 **Figure 1:**

1372 **Experimental schemes for maternal morphine exposure and offspring behavioral**

1373 **evaluation. A.** After a week of habituation to 0.2% saccharin, female mice drank from a single  
1374 bottle containing either 0.2% saccharin or 0.2 % saccharin + morphine. Mice were then  
1375 transitioned to a C2BC paradigm that lasted throughout mating, gestation, and the first week  
1376 after delivery. On PND 7, offspring were cross-fostered (CF) to drug-naïve dams and were  
1377 subsequently tested in various behavioral paradigms during both adolescence and adulthood. **B.**  
1378 Evaluation of offspring behavior prior to weaning (PND 0 – 28) was conducted before and after  
1379 cross-fostering and included observation of spontaneous activity (moving mouse icon) on PND  
1380 3, recording of ultrasonic vocalizations (microphone icon) on PND 6 and PND 8, and  
1381 measurement of body weight (scale icon) on PND 3, 5, 7, 9, 11, 13, 15.

1382 GD = Gestation Day; Mor= morphine; Sacc=saccharin; H<sub>2</sub>O= water; PND= Postnatal Day;  
1383 C2BC= continuous two-bottle choice

1384

1385 **Figure 2:**

1386 **Validation of the paradigm for maternal morphine exposure. (A & B)** Morphine

1387 consumption and physical signs measured in female breeders while having access to a single  
1388 bottle containing morphine (forced morphine exposure). **A.** Forced morphine intake during the  
1389 initial phase of treatment, when morphine dams' solution is ramped up from 0.1 mg/mL  
1390 morphine to 0.2 mg/mL morphine, respectively (n=11). **B.** Total physical signs in morphine-  
1391 exposed dams at baseline (pre-treatment), and 8 hours after withdrawal from forced morphine

1392 exposure (n=10). **(C-E)** Morphine intake and physical signs during the C2BC paradigm. **C.**  
1393 Morphine intake in the C2BC paradigm during weeks 2-8. (n=10-11/week) \* p<0.05, \*\*p<0.01  
1394 compared to Week 2; # p<0.05, ## p<0.01 compared to Week 3. **D.** Total physical signs for  
1395 morphine-exposed dams while morphine sated in the C2BC paradigm and 8 hours after  
1396 withdrawal from morphine (n=10). **E.** Comparison of total physical signs in control, saccharin-  
1397 drinking dams and morphine-drinking dams 8 hours after morphine withdrawal in the C2BC  
1398 paradigm (n=12,10).  
1399 \*\* p<0.01, \*\*\*p<0.001, \*\*\*\* p<0.0001; Mor= morphine, WD= withdrawal, C2BC= continuous  
1400 two-bottle choice, Sacc=saccharin

1401

1402 **Figure 3:**

1403 **Behavioral outcomes in PND 2-15 pups before and after cross-fostering.** **A.** PND 3 morphine  
1404 offspring exhibited greater physical signs than control offspring (n=12,13). **B.** Offspring body  
1405 weight before and after cross-fostering (PND 3-15); (10-18 litters/PND). **C.** Average number of  
1406 USV syllables before and after CF (litter n= 9,7). **D.** Average delta time (s), or time duration, of  
1407 each USV call (n= 9,7). **E.** Average delta frequency (Hz), or frequency range of each USV call  
1408 (litter n= 9,7). **F.** Average center frequency (Hz), or middle frequency for each USV call (litter  
1409 n= 9,7). **G.** Average low frequency (Hz) for each USV call (litter n= 9,7). **H.** Average high  
1410 frequency (Hz) for each USV call (litter n= 9,7). PND= postnatal day, CF= Cross-Fostered.  
1411 # indicates main effect: # p<0.05, ## p<0.01, ### p<0.001, #### p<0.0001; \* indicates post-hoc  
1412 significance: \* p<0.05

1413

1414 **Figure 4:**

1415 **Sex-specific changes in baseline behavior in adolescent offspring from morphine-exposed**  
1416 **dams. A.** Experimental scheme showing the sequence of behavioral tests for the analysis of PND  
1417 28-49 adolescent offspring. **B.** Average number of total physical signs in control and morphine-  
1418 exposed offspring (n=46, 36). **C.** Average number of marbles buried in the Marble Burying Test  
1419 (MBT) (n=37, 34). **D.** Average distance travelled (m) in the Open Field Arena (OFA) (n=36, 36).  
1420 **E.** Average center distance ratio in the OFA (n=36, 36). **F.** Average open arm entry ratio in the  
1421 Elevated Plus Maze (EPM) (n=36, 37). **G.** Average immobility time (s) in the Tail Suspension  
1422 Test (TST) (n=28, 30). **H.** Average global behavioral score (GBS) calculated as the summation  
1423 of all the z-scores for each behavioral test for each animal (n=28, 29). Percent of offspring from  
1424 control and morphine-exposed dams (**I**), and male (**J**) and female (**K**) offspring that classified as  
1425 high, moderate, and low scorers based on their global behavioral score for baseline behavior.

1426 \*\*p<0.01

1427 PND = postnatal day; SS = somatic signs; Blue symbols = males; Pink symbols = females

1428

1429 **Figure 5:**

1430 **Sex-specific changes in baseline behavior of adult offspring from morphine-taking dams. A.**  
1431 Experimental scheme for the analysis of adult offspring in a battery of behavioral tests. **B.**  
1432 Average baseline total physical signs observed in offspring (n=19, 17). **C.** Average marbles  
1433 buried in the Marble Burying Test (MBT) (n=19, 18). **D.** Average distance travelled (m) in the  
1434 Open Field Arena (OFA) (n=19, 18). **E.** Average center distance ratio in the OFA (n=19, 18). **F.**  
1435 Average time in the open arms of the Elevated Plus Maze (EPM) (n=19, 18). **G.** Average open  
1436 arm entry ratio in the EPM (n=19, 18). **H.** Average immobility time (s) in the Tail Suspension  
1437 Test (TST) (n=19, 18). **I.** Average global behavioral scores (GBS) calculated as the summation

1438 of all the z-scores for each behavioral test for each animal (n=19, 18). Percent of control and  
1439 morphine-exposed offspring (**J**), male (**K**), and female (**L**) offspring that classified as high,  
1440 moderate, and low scorers based on their GBS for baseline behavior.

1441 \*\*p<0.01; SS = somatic signs; Blue symbols = males; Pink symbols = females

1442

1443 **Figure 6:**

1444 **Ethanol 2-hour intake and preference for male and female offspring in the I2BC paradigm.**

1445 **A.** Schematic of the adult ethanol I2BC experimental timeline after mice underwent baseline  
1446 adolescent behavioral testing. (**B & C**) Average 2-hr ethanol intake (g/kg) (B) and preference  
1447 (%) (C) for male offspring during weeks 1-10 of ethanol drinking (n=14). (**D & E**) Average 2-hr  
1448 ethanol intake (g/kg) (D) and preference (%) (E) for female offspring during weeks 1-10 of  
1449 ethanol drinking (n=12).

1450 # p<0.05 main effect of dam treatment for ‘Acquisition’ and ‘Fading’ phase; \* indicates post-hoc  
1451 significance: \* p<0.05

1452 PND = postnatal day; MBT = marble burying test; OFA = open field arena; EPM = elevated plus  
1453 maze; TST = tail suspension test; I2BC = intermittent two-bottle choice

1454

1455

1456
